# Supplementary material for: PiggyBac Transposon Mining in the Small Genomes of Animals
Source: MDPI journal article supplement (doi:10.3390/biology13010024), 2023-12-31
Supplement: s1 [file s1]

# Pokey

**A**

A-PiggyBac-13\_Smed  
A-PiggyBac-2\_Smed  
A-PiggyBac-3\_Trub  
B-PiggyBac-12\_Aaur  
B-PiggyBac-12\_Acal  
B-PiggyBac-15\_Acal  
B-PiggyBac-16\_Acal  
B-PiggyBac-17\_Acal  
B-PiggyBac-18\_Atri  
B-PiggyBac-19\_Atri  
B-PiggyBac-2\_Ptep  
B-PiggyBac-3\_Smed  
B-PiggyBac-4\_Csap  
B-PiggyBac-4\_Tbim  
B-PiggyBac-5\_Aamp  
B-PiggyBac-5\_Lrub  
C-PiggyBac-10\_Atri  
C-PiggyBac-14\_Atri  
C-PiggyBac-16\_Atri  
C-PiggyBac-1\_Agra  
C-PiggyBac-1\_Airr  
C-PiggyBac-1\_Bgla  
C-PiggyBac-1\_Lpic  
C-PiggyBac-1\_Lvar  
C-PiggyBac-1\_Ppalm  
C-PiggyBac-20\_Atri  
C-PiggyBac-21\_Atri  
C-PiggyBac-27\_Acal  
C-PiggyBac-2\_Agra  
C-PiggyBac-2\_Bgla  
C-PiggyBac-2\_Cgig  
C-PiggyBac-2\_Lvar  
C-PiggyBac-2\_Oedu  
C-PiggyBac-3\_Aaur  
C-PiggyBac-3\_Atri  
C-PiggyBac-4\_Bgla  
C-PiggyBac-4\_Lbes  
C-PiggyBac-4\_Oedu  
C-PiggyBac-4\_Smed  
C-PiggyBac-5\_Bgla  
C-PiggyBac-6\_Cvir  
C-PiggyBac-6\_Mvir  
C-PiggyBac-7\_Bgla  
C-PiggyBac-8\_Bgla  
C-PiggyBac-8\_Lrub  
C-PiggyBac-9\_Lrub  
D-PiggyBac-1\_Cgig  
D-PiggyBac-1\_Oedu  
D-PiggyBac-3\_Bgla  
D-PiggyBac-4\_Tver  
D-PiggyBac-6\_Aaur  
E-PiggyBac-11\_Lrub  
E-PiggyBac-12\_Smed  
E-PiggyBac-19\_Acal  
E-PiggyBac-1\_Acal  
E-PiggyBac-1\_Lrub  
E-PiggyBac-20\_Acal  
E-PiggyBac-26\_Acal  
E-PiggyBac-28\_Acal  
E-PiggyBac-2\_Ppale  
E-PiggyBac-4\_Lrub  
E-PiggyBac-7\_Lrub  
E-PiggyBac-7\_Tver  
F-PiggyBac-10\_Acal  
F-PiggyBac-1\_Alon  
F-PiggyBac-1\_Tbim  
F-PiggyBac-2\_Aamp  
F-PiggyBac-2\_Acal  
F-PiggyBac-2\_Alon  
F-PiggyBac-2\_Hrob  
F-PiggyBac-3\_Aamp  
F-PiggyBac-3\_Csap  
F-PiggyBac-3\_Hrob  
F-PiggyBac-4\_Hrob  
F-PiggyBac-5\_Hrob  
F-PiggyBac-6\_Acal  
F-PiggyBac-6\_Bgla  
Pokey-PiggyBac-1\_Dobt  
Pokey-PiggyBac-1\_Dpuli  
Pokey-PiggyBac-2\_Dobt  
Pokey-PiggyBac-2\_Dpuli

**B**

**C**

**D**

**E**

**F**

**key**

MSK  
MTK  
MDY  
MAS  
MAT  
MAR  
MTA  
MTS  
MTR  
MSR  
MTR  
MAK  
MAS  
MAV  
MAY  
MAR  
MDC  
M  
MTSCS  
MSKNTHR  
MAE  
MI  
MSA  
MSA  
MAASTSV  
MVQQVTR  
MSK  
MDD  
MAR  
MADK  
MDVVDDV  
MAP  
MEVVDDV  
MDS  
MYS  
MASSSDS  
MAM  
MAE  
MSN  
MDAMP  
MAD  
MSD  
MDL  
MVNDS  
MAS  
MVI  
MAD  
MED  
MGS  
MPG  
MAAMNTRFFYRKR  
MDK  
MEL  
ASK  
MNV  
CGFNDFR  
MAT  
MAAMNTRFFYRKR  
MGKRSK  
MST  
MED  
MDR  
MAI  
MAM  
MED  
MRR  
MYQ  
MSN  
M  
MLI  
XAL  
MSE  
MSA  
MDP  
M  
MPQ  
MGRNQ  
MAKNK  
MARNK  
MAKN

MSK  
MTK  
MDY  
MAS  
MAT  
MAR  
MTA  
MTS  
MTR  
MSR  
MTR  
MAK  
MAS  
MAV  
MAY  
MAR  
MDC  
M  
MTSCS  
MSKNTHR  
MAE  
MI  
MSA  
MSA  
MAASTSV  
MVQQVTR  
MSK  
MDD  
MAR  
MADK  
MDVVDDV  
MAP  
MEVVDDV  
MDS  
MYS  
MASSSDS  
MAM  
MAE  
MSN  
MDAMP  
MAD  
MSD  
MDL  
MVNDS  
MAS  
MVI  
MAD  
MED  
MGS  
MPG  
MAAMNTRFFYRKR  
MDK  
MEL  
ASK  
MNV  
CGFNDFR  
MAT  
MAAMNTRFFYRKR  
MGKRSK  
MST  
MED  
MDR  
MAI  
MAM  
MED  
MRR  
MYQ  
MSN  
M  
MLI  
XAL  
MSE  
MSA  
MDP  
M  
MPQ  
MGRNQ  
MAKNK  
MARNK  
MAKN

MSK  
MTK  
MDY  
MAS  
MAT  
MAR  
MTA  
MTS  
MTR  
MSR  
MTR  
MAK  
MAS  
MAV  
MAY  
MAR  
MDC  
M  
MTSCS  
MSKNTHR  
MAE  
MI  
MSA  
MSA  
MAASTSV  
MVQQVTR  
MSK  
MDD  
MAR  
MADK  
MDVVDDV  
MAP  
MEVVDDV  
MDS  
MYS  
MASSSDS  
MAM  
MAE  
MSN  
MDAMP  
MAD  
MSD  
MDL  
MVNDS  
MAS  
MVI  
MAD  
MED  
MGS  
MPG  
MAAMNTRFFYRKR  
MDK  
MEL  
ASK  
MNV  
CGFNDFR  
MAT  
MAAMNTRFFYRKR  
MGKRSK  
MST  
MED  
MDR  
MAI  
MAM  
MED  
MRR  
MYQ  
MSN  
M  
MLI  
XAL  
MSE  
MSA  
MDP  
M  
MPQ  
MGRNQ  
MAKNK  
MARNK  
MAKN

MSK  
MTK  
MDY  
MAS  
MAT  
MAR  
MTA  
MTS  
MTR  
MSR  
MTR  
MAK  
MAS  
MAV  
MAY  
MAR  
MDC  
M  
MTSCS  
MSKNTHR  
MAE  
MI  
MSA  
MSA  
MAASTSV  
MVQQVTR  
MSK  
MDD  
MAR  
MADK  
MDVVDDV  
MAP  
MEVVDDV  
MDS  
MYS  
MASSSDS  
MAM  
MAE  
MSN  
MDAMP  
MAD  
MSD  
MDL  
MVNDS  
MAS  
MVI  
MAD  
MED  
MGS  
MPG  
MAAMNTRFFYRKR  
MDK  
MEL  
ASK  
MNV  
CGFNDFR  
MAT  
MAAMNTRFFYRKR  
MGKRSK  
MST  
MED  
MDR  
MAI  
MAM  
MED  
MRR  
MYQ  
MSN  
M  
MLI  
XAL  
MSE  
MSA  
MDP  
M  
MPQ  
MGRNQ  
MAKNK  
MARNK  
MAKN

MSK  
MTK  
MDY  
MAS  
MAT  
MAR  
MTA  
MTS  
MTR  
MSR  
MTR  
MAK  
MAS  
MAV  
MAY  
MAR  
MDC  
M  
MTSCS  
MSKNTHR  
MAE  
MI  
MSA  
MSA  
MAASTSV  
MVQQVTR  
MSK  
MDD  
MAR  
MADK  
MDVVDDV  
MAP  
MEVVDDV  
MDS  
MYS  
MASSSDS  
MAM  
MAE  
MSN  
MDAMP  
MAD  
MSD  
MDL  
MVNDS  
MAS  
MVI  
MAD  
MED  
MGS  
MPG  
MAAMNTRFFYRKR  
MDK  
MEL  
ASK  
MNV  
CGFNDFR  
MAT  
MAAMNTRFFYRKR  
MGKRSK  
MST  
MED  
MDR  
MAI  
MAM  
MED  
MRR  
MYQ  
MSN  
M  
MLI  
XAL  
MSE  
MSA  
MDP  
M  
MPQ  
MGRNQ  
MAKNK  
MARNK  
MAKN

MSK  
MTK  
MDY  
MAS  
MAT  
MAR  
MTA  
MTS  
MTR  
MSR  
MTR  
MAK  
MAS  
MAV  
MAY  
MAR  
MDC  
M  
MTSCS  
MSKNTHR  
MAE  
MI  
MSA  
MSA  
MAASTSV  
MVQQVTR  
MSK  
MDD  
MAR  
MADK  
MDVVDDV  
MAP  
MEVVDDV  
MDS  
MYS  
MASSSDS  
MAM  
MAE  
MSN  
MDAMP  
MAD  
MSD  
MDL  
MVNDS  
MAS  
MVI  
MAD  
MED  
MGS  
MPG  
MAAMNTRFFYRKR  
MDK  
MEL  
ASK  
MNV  
CGFNDFR  
MAT  
MAAMNTRFFYRKR  
MGKRSK  
MST  
MED  
MDR  
MAI  
MAM  
MED  
MRR  
MYQ  
MSN  
M  
MLI  
XAL  
MSE  
MSA  
MDP  
M  
MPQ  
MGRNQ  
MAKNK  
MARNK  
MAKN

MSK  
MTK  
MDY  
MAS  
MAT  
MAR  
MTA  
MTS  
MTR  
MSR  
MTR  
MAK  
MAS  
MAV  
MAY  
MAR  
MDC  
M  
MTSCS  
MSKNTHR  
MAE  
MI  
MSA  
MSA  
MAASTSV  
MVQQVTR  
MSK  
MDD  
MAR  
MADK  
MDVVDDV  
MAP  
MEVVDDV  
MDS  
MYS  
MASSSDS  
MAM  
MAE  
MSN  
MDAMP  
MAD  
MSD  
MDL  
MVNDS  
MAS  
MVI  
MAD  
MED  
MGS  
MPG  
MAAMNTRFFYRKR  
MDK  
MEL  
ASK  
MNV  
CGFNDFR  
MAT  
MAAMNTRFFYRKR  
MGKRSK  
MST  
MED  
MDR  
MAI  
MAM  
MED  
MRR  
MYQ  
MSN  
M  
MLI  
XAL  
MSE  
MSA  
MDP  
M  
MPQ  
MGRNQ  
MAKNK  
MARNK  
MAKN

MSK  
MTK  
MDY  
MAS  
MAT  
MAR  
MTA  
MTS  
MTR  
MSR  
MTR  
MAK  
MAS  
MAV  
MAY  
MAR  
MDC  
M  
MTSCS  
MSKNTHR  
MAE  
MI  
MSA  
MSA  
MAASTSV  
MVQQVTR  
MSK  
MDD  
MAR  
MADK  
MDVVDDV  
MAP  
MEVVDDV  
MDS  
MYS  
MASSSDS  
MAM  
MAE  
MSN  
MDAMP  
MAD  
MSD  
MDL  
MVNDS  
MAS  
MVI  
MAD  
MED  
MGS  
MPG  
MAAMNTRFFYRKR  
MDK  
MEL  
ASK  
MNV  
CGFNDFR  
MAT  
MAAMNTRFFYRKR  
MGKRSK  
MST  
MED  
MDR  
MAI  
MAM  
MED  
MRR  
MYQ  
MSN  
M  
MLI  
XAL  
MSE  
MSA  
MDP  
M  
MPQ  
MGRNQ  
MAKNK  
MARNK  
MAKN

MSK  
MTK  
MDY  
MAS  
MAT  
MAR  
MTA  
MTS  
MTR  
MSR  
MTR  
MAK  
MAS  
MAV  
MAY  
MAR  
MDC  
M  
MTSCS  
MSKNTHR  
MAE  
MI  
MSA  
MSA  
MAASTSV  
MVQQVTR  
MSK  
MDD  
MAR  
MADK  
MDVVDDV  
MAP  
MEVVDDV  
MDS  
MYS  
MASSSDS  
MAM  
MAE  
MSN  
MDAMP  
MAD  
MSD

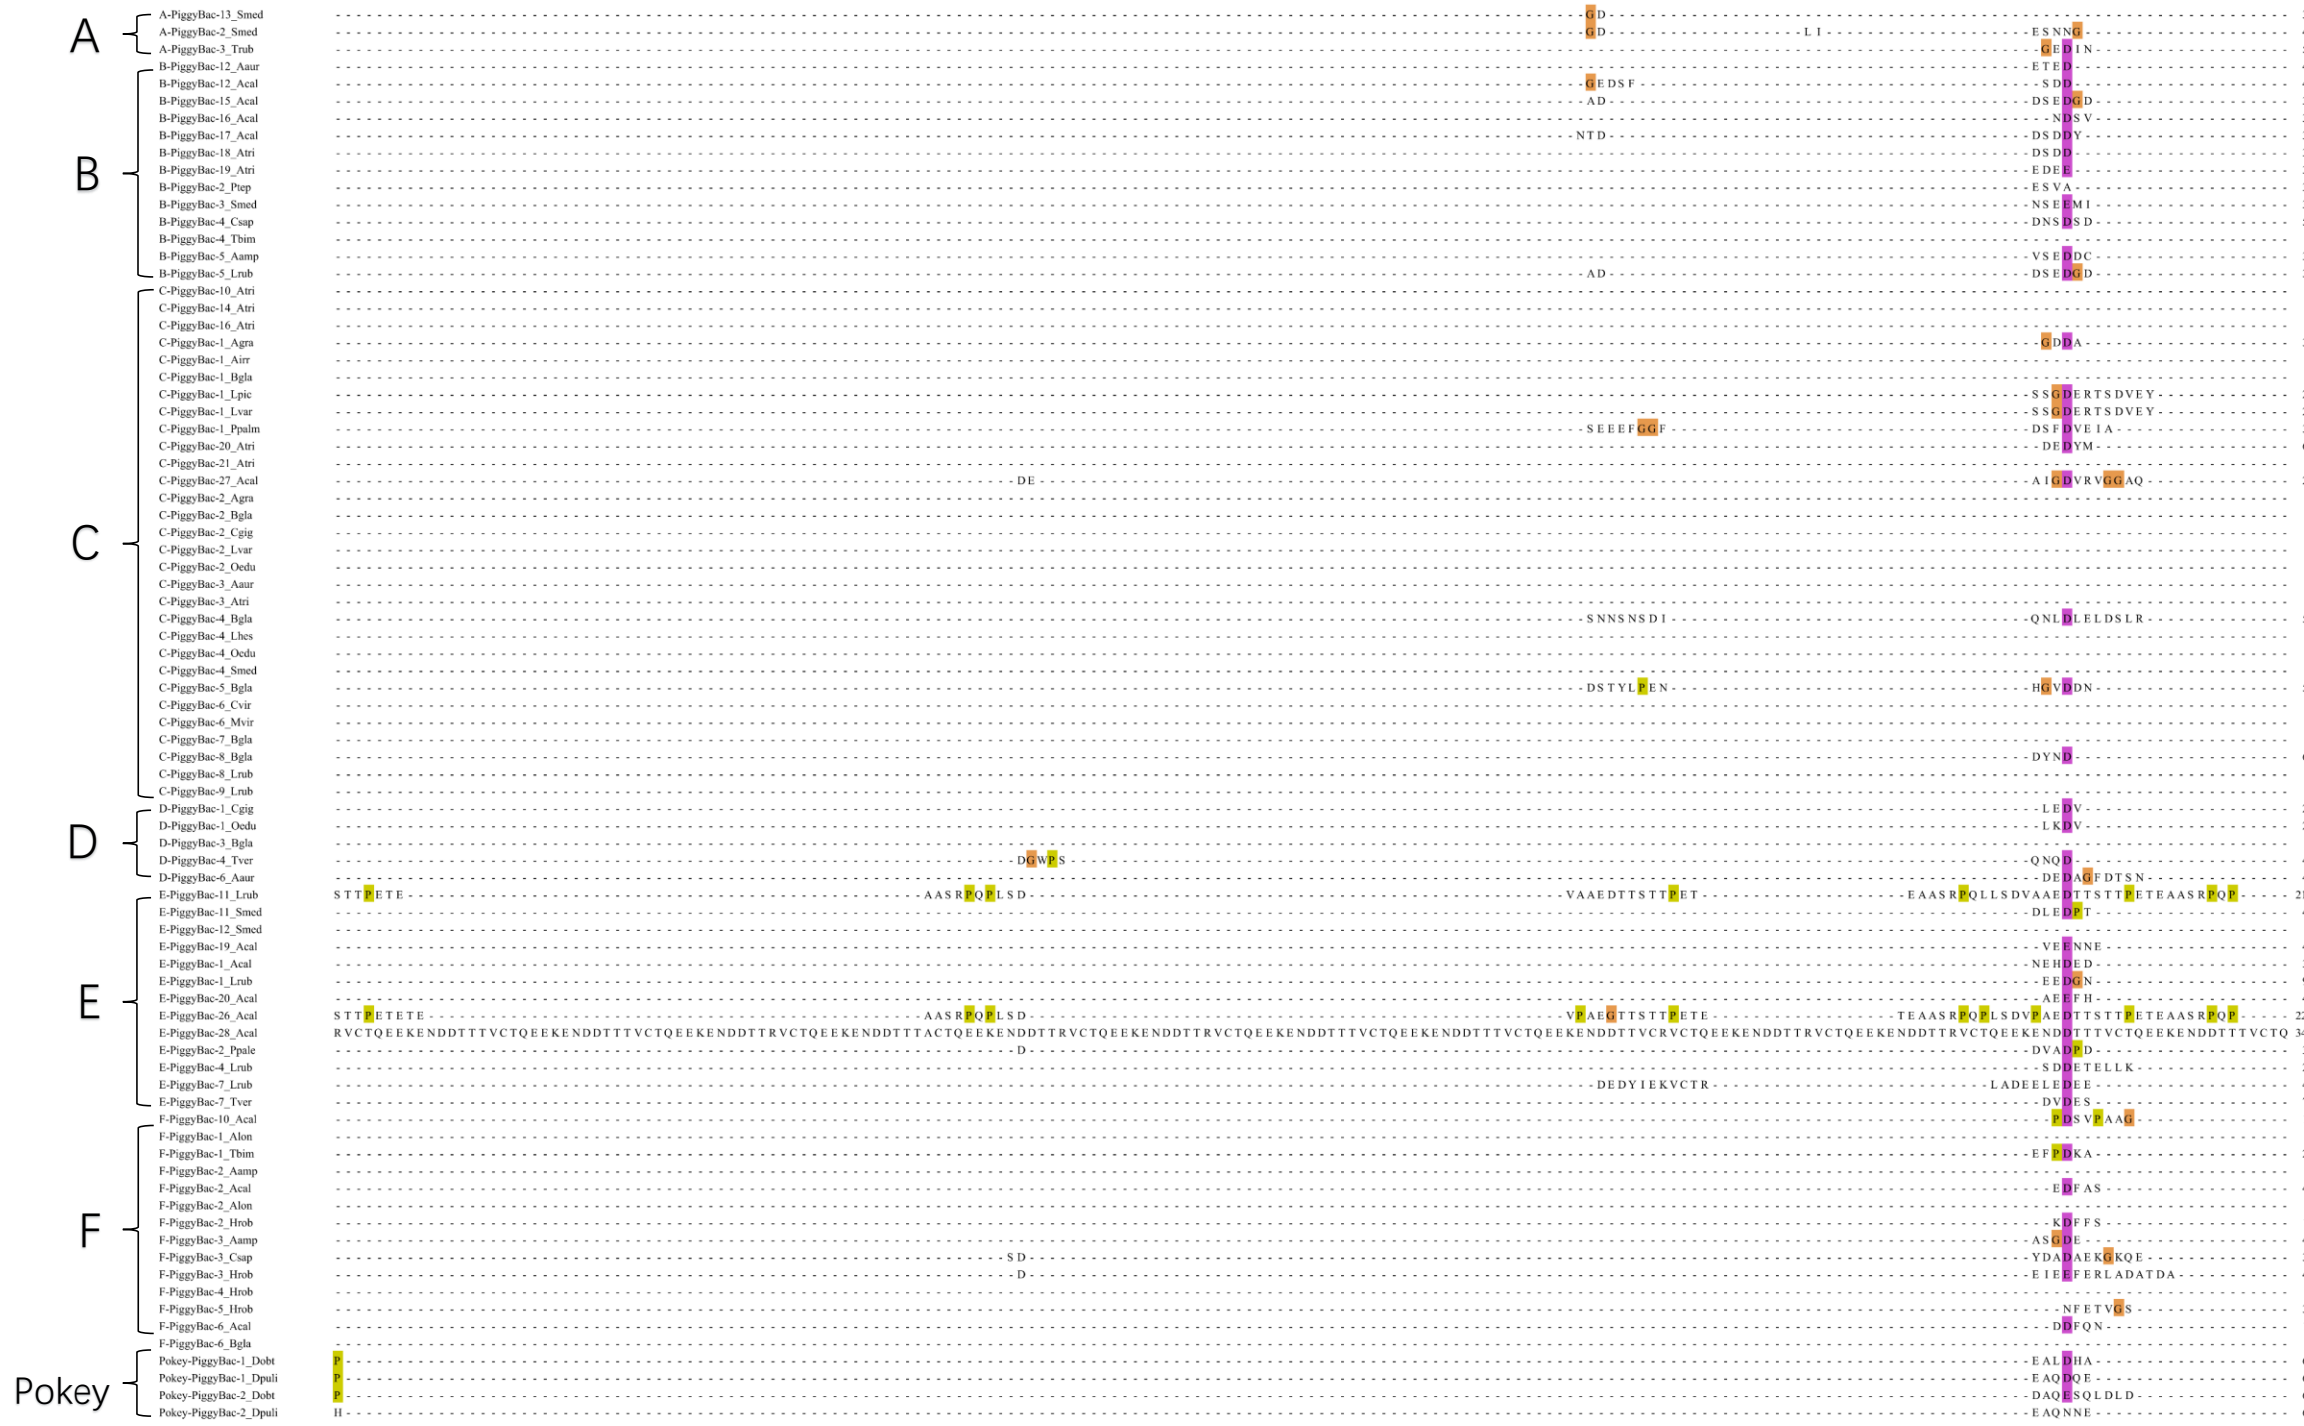





**A**

**B**

**C**

**D**

**E**

**F**

**Pokey**

Phylogenetic tree showing the relationships between Pokey protein variants. The tree is rooted at the top and branches downwards. The variants are grouped into six main clusters (A-F) based on their phylogenetic relationships. The alignment shows the amino acid sequences for each variant, with positions 1-169. Variants are color-coded: red for those with a mutation at position 1, green for those with a mutation at position 169, and blue for those with a mutation at position 168. The alignment is presented in a grid format with 169 columns and 169 rows. The first column shows the variant name, and the subsequent columns show the amino acid sequence. The alignment is presented in a grid format with 169 columns and 169 rows. The first column shows the variant name, and the subsequent columns show the amino acid sequence.



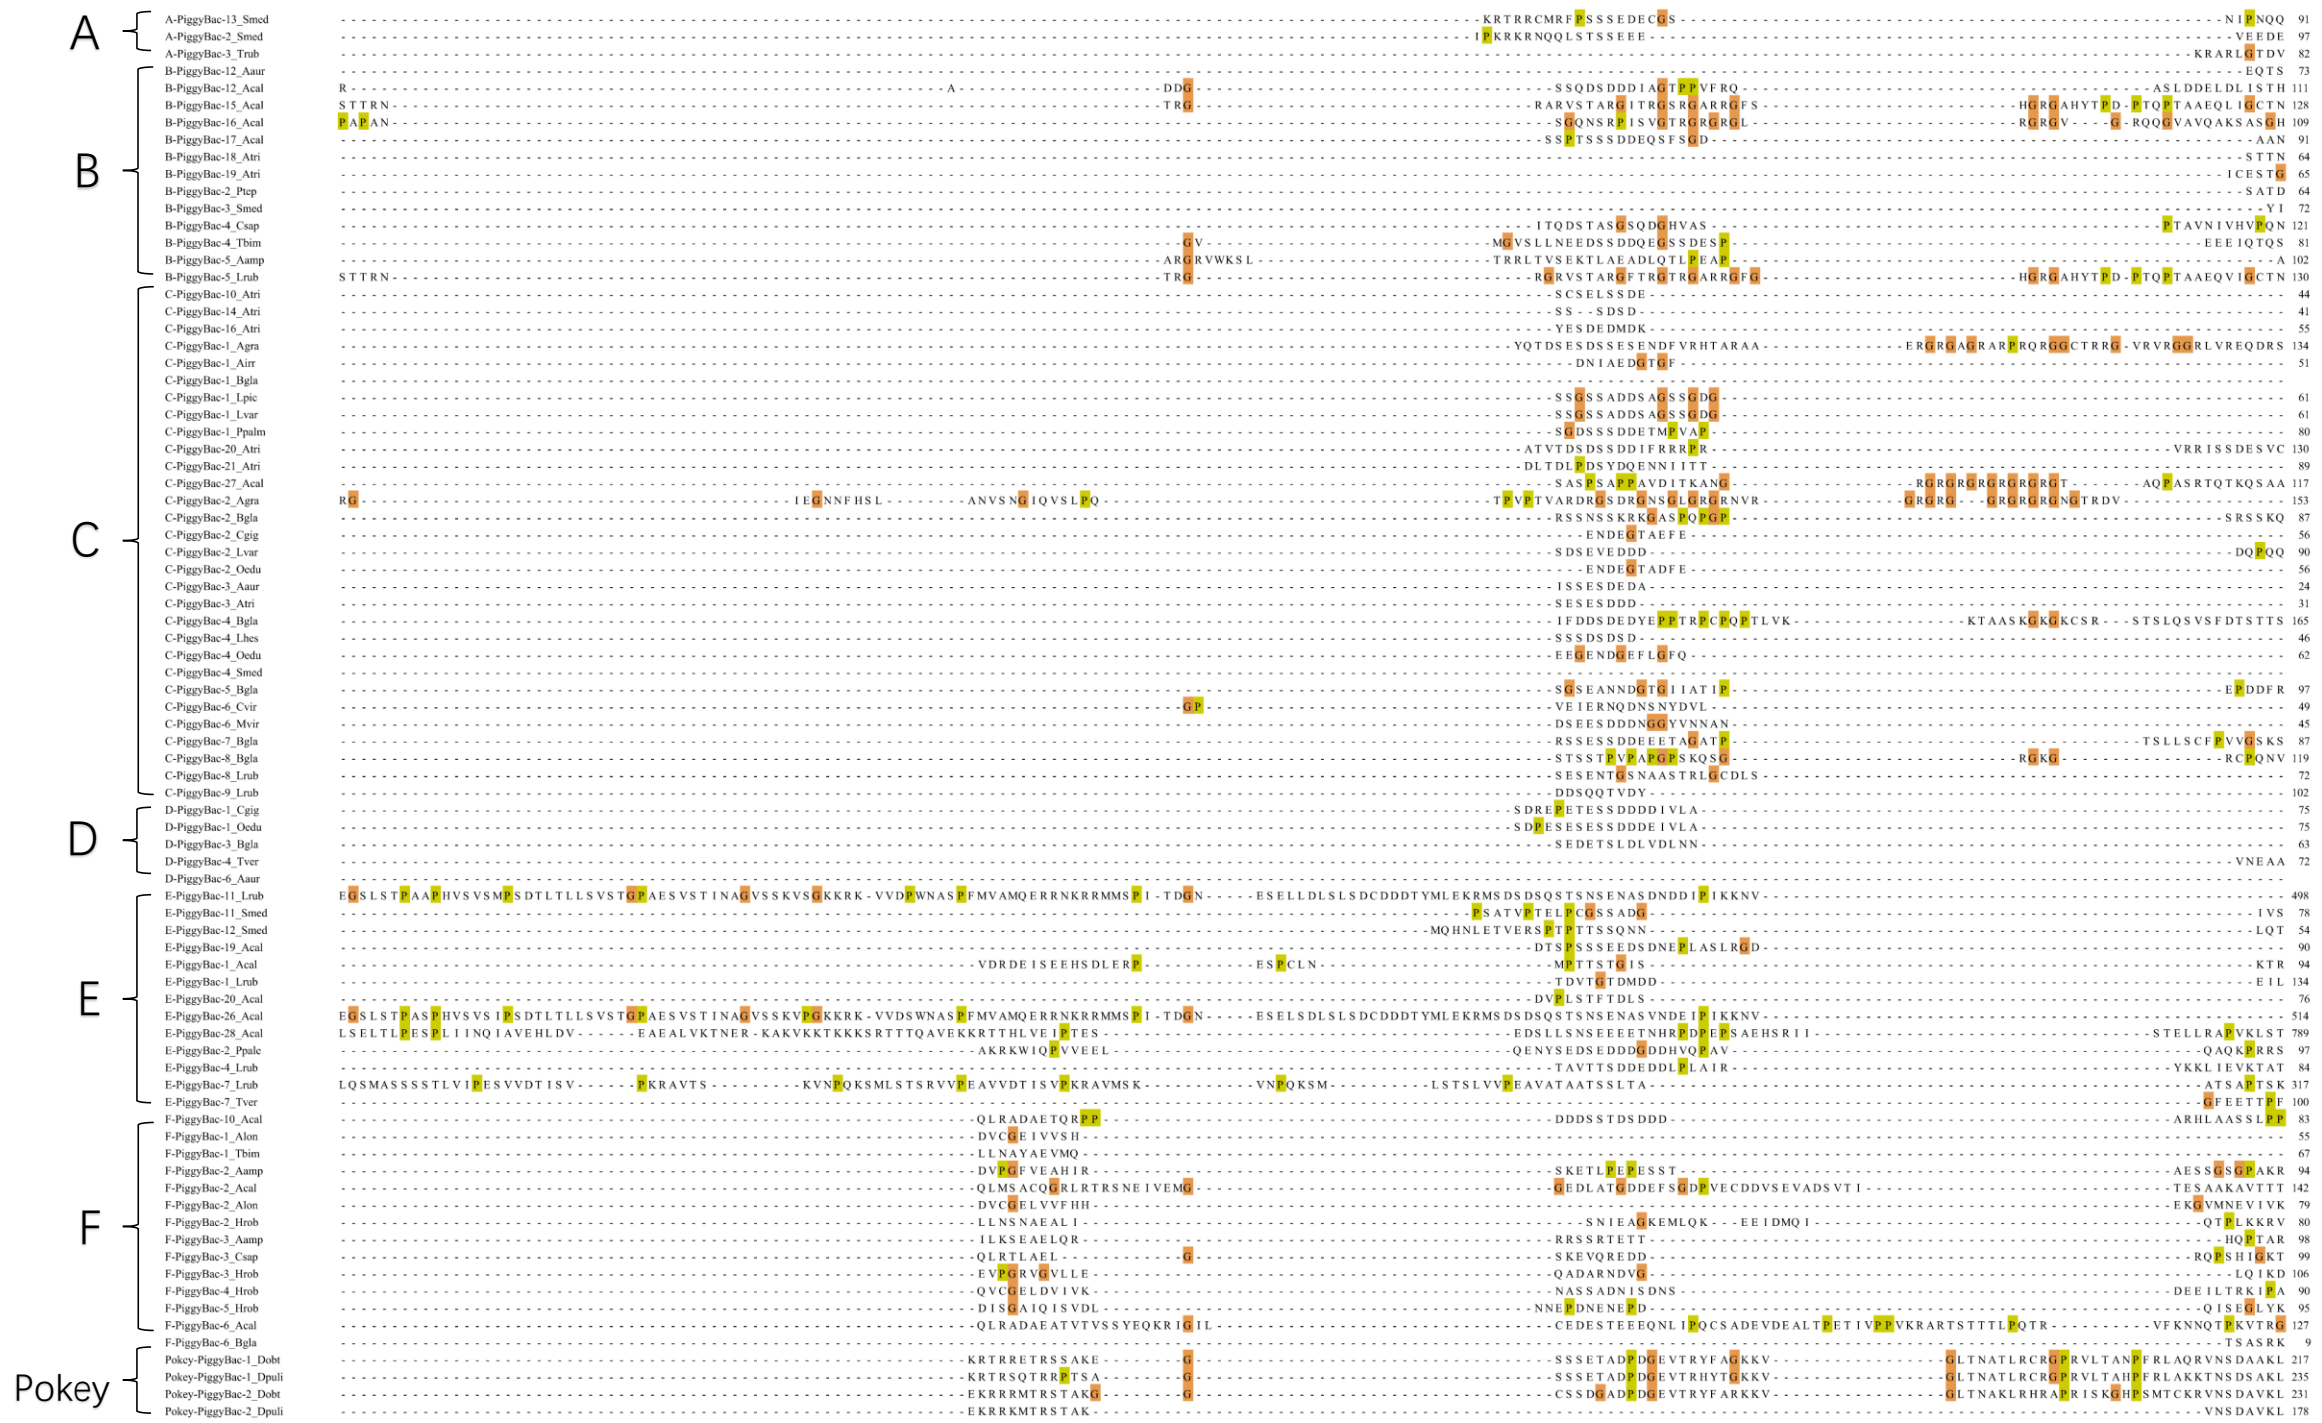

A {  
A-PiggyBac-13\_Smed  
A-PiggyBac-2\_Smed  
A-PiggyBac-3\_Trub  
B-PiggyBac-12\_Aaur  
B-PiggyBac-12\_Acal  
B-PiggyBac-15\_Acal  
B-PiggyBac-16\_Acal  
B-PiggyBac-17\_Acal  
B-PiggyBac-18\_Atri  
B-PiggyBac-19\_Atri  
B-PiggyBac-2\_Plep  
B-PiggyBac-3\_Smed  
B-PiggyBac-4\_Csap  
B-PiggyBac-4\_Tbim  
B-PiggyBac-5\_Aamp  
B-PiggyBac-5\_Lrub  
C-PiggyBac-10\_Atri  
C-PiggyBac-14\_Atri  
C-PiggyBac-16\_Atri  
C-PiggyBac-1\_Agra  
C-PiggyBac-1\_Airr  
C-PiggyBac-1\_Bgla  
C-PiggyBac-1\_Lpic  
C-PiggyBac-1\_Lvar  
C-PiggyBac-1\_Ppalm  
C-PiggyBac-20\_Atri  
C-PiggyBac-21\_Atri  
C-PiggyBac-27\_Acal  
C-PiggyBac-2\_Agra  
C-PiggyBac-2\_Bgla  
C-PiggyBac-2\_Cgig  
C-PiggyBac-2\_Lvar  
C-PiggyBac-2\_Oedu  
C-PiggyBac-3\_Aaur  
C-PiggyBac-3\_Atri  
C-PiggyBac-4\_Bgla  
C-PiggyBac-4\_Uhes  
C-PiggyBac-4\_Oedu  
C-PiggyBac-4\_Smed  
C-PiggyBac-5\_Bgla  
C-PiggyBac-6\_Cvir  
C-PiggyBac-6\_Mvir  
C-PiggyBac-7\_Bgla  
C-PiggyBac-8\_Bgla  
C-PiggyBac-8\_Lrub  
C-PiggyBac-9\_Lrub  
D-PiggyBac-1\_Cgig  
D-PiggyBac-1\_Oedu  
D-PiggyBac-3\_Bgla  
D-PiggyBac-4\_Tver  
D-PiggyBac-6\_Aaur  
E-PiggyBac-11\_Lrub  
E-PiggyBac-11\_Smed  
E-PiggyBac-12\_Smed  
E-PiggyBac-19\_Acal  
E-PiggyBac-1\_Acal  
E-PiggyBac-1\_Lrub  
E-PiggyBac-20\_Acal  
E-PiggyBac-26\_Acal  
E-PiggyBac-28\_Acal  
E-PiggyBac-2\_Ppale  
E-PiggyBac-4\_Lrub  
E-PiggyBac-7\_Lrub  
E-PiggyBac-7\_Tver  
F-PiggyBac-10\_Acal  
F-PiggyBac-1\_Alon  
F-PiggyBac-1\_Tbim  
F-PiggyBac-2\_Aamp  
F-PiggyBac-2\_Acal  
F-PiggyBac-2\_Alon  
F-PiggyBac-2\_Hrob  
F-PiggyBac-3\_Aamp  
F-PiggyBac-3\_Csap  
F-PiggyBac-3\_Hrob  
F-PiggyBac-4\_Hrob  
F-PiggyBac-5\_Hrob  
F-PiggyBac-6\_Acal  
F-PiggyBac-6\_Bgla  
Pokey {  
Pokey-PiggyBac-1\_Dobt  
Pokey-PiggyBac-1\_Dpuli  
Pokey-PiggyBac-2\_Dobt  
Pokey-PiggyBac-2\_Dpuli

TEIAS--DG-----TIWTRIEEGSA--GRSPH-----HSAF--K-.-.-D  
IELSA--DG-----TVWRKLNEGSG--GRLPL-----HNIF--K-.-.-D  
TETAK--DG-----TVWHEEOVGTGP--HFTPP-----S-.-.-YN  
FFVVK--DK-----TTKWQKEFRNQ--KRIPV-----QNIIT--K-.-.-Q  
LYESK--NG-----KEVWLKTFYVST--GRQPS-----RNVVM--K-.-.-Q  
TIVDR--TG-----RNWTTETPVI--HRRQV-----QDII--R-.-.-Q  
LMTGK--NG-----FLWETQPPAS--GRRRV-----QDII--R-.-.-T  
GYKSR--TG-----ROWSKTISKKK--GRASA-----RDVL--R-.-.-P  
FYIGK--DR-----VTKWQKEKYRQN--VRKPS-----RNIIT--S-.-.-K  
DYVGK--DG-----ITWHKKEPRKN--VRTPA-----HNIIT--S-.-.-K  
FYIGK--DK-----VTKWKLKKYSQS--VRKPA-----RNIIT--S-.-.-K  
SYISK--DG-----TEWNSVVIK--GRTAA-----HNIIT--R-.-.-G  
SRCAR--DK-----TYWSRTPLRSI--PLQPS-----HNIT--T-.-.-Q  
DRFSK--NG-----SYWNEPTHT--GRTKS-----HNIIT--R-.-.-S  
THIVR--RG-----GQVAAEWTVEENVQ--RRRDR-----ANIIT--R-.-.-E  
TIVDR--TG-----RHWTTETPLI--HRRQV-----QDII--R-.-.-Q  
--DLS--SV-----RIFTEVDVKNP--PVCF-----RFKF--T-.-.-G  
--DLF--AA-----QWCAIQKTKV--FPAPV-----RFAF--T-.-.-A  
--NLD--SV-----QWCKVSSA--TAPF-----RFQF--D-.-.-G  
RTFVRVFDGHH-----AFVWEEKINNRS--TAPF-----MRNF--A-.-.-E  
--NV-----DNWVEGQKEPS--TFTF--T-.-.-G  
--SA-----EEWTVDDH--DCGPR-----VLF--T-.-.-A  
--DG-----GAGAGLWTRVNNLDD--DETP-----RRRF--R-.-.-A  
--DG-----GAGAGLWTRVNNLDD--DETP-----RRRF--R-.-.-A  
--HE-----CDWTDNLTDYF--DIFINQ--D-.-.-A  
DIHVS--DH-----SSWVDVSKQ--DNYYP--NIDF--TT-.-.-G  
--DG-----DWTEYVGRQK--VFEF--I-.-.-G  
SASAV--DE-----WTWERTFQKK--DIF--W-.-.-G  
--NEME--EIGGRCPNNNWRIDTDPV--DSPTYTDTSWCPQFMQS--G  
RRIATA--DV-----LHVEQTEWEEVDLDEL--HAPS--THNNF--RFLDKD  
--DG-----HTWIQGLDLVN--AIF--R-.-.-G  
QLPQQ--QP--DMWIDLDE--DWAPSWQ--QNSY--Q-.-.-E  
--DG-----DTWVQGNMDVR--NLRF--R-.-.-G  
--SLD--DA-----RDWCRLEDNL--GPSPP--RFPF--T-.-.-A  
--TLS--AA-----RCWCIDLQAP--SAPF--NFQF--T-.-.-L  
STSNS--DSAD--PLWDHITYTT--ENN--RFHLLK  
--DLL--AA-----QWCTIQKTKL--PAPA--RFPF--T-.-.-A  
--DG-----NEWAKENFQLRM--ESRY--R-.-.-N  
--RA-----GERIWSKEG--NFVYK--LHQF--Q-.-.-E  
RRTSGNNDG--WQWERVADN--CVST--ANTF--RMSQPS  
--NE-----DLWAGDRTGH--QLTF--T-.-.-G  
--LFWFRIRFP--EMED--GIIF--A-.-.-E  
KKRKLN--DNHNV--VINRSISDWIMVDFET--KNQF--SFAKN  
SSTSKF--DSGWSLNTFTIT--QRSS--NRTF--T-.-.-E  
--SAYD--RW--LMDF--T-.-.-A  
--DST--SA--FQWSEKDVHRE--RFTF--T-.-.-G  
--DY--NRWTENLRDIN--VAF--N-.-.-G  
--DY--NRWTDNIRDIN--APF--C-.-.-G  
--DS--GDSATTDDVV--VENF--T-.-.-E  
STAS--EE--ITWTKVIDRSKV--DLDK--NLDF--SSR--QI--IEWNSNLIENKNI--FIK--D-.-.-Q  
--RP--LRWKLRD--KFEEN--LVTL--Q-.-.-Q  
KPSKS--KD--ILWQKKN--L--KNEE--QLHF--C-.-.-G  
APFNS--RN--LVWRVKN--M--DMVQN--AFQF--A-.-.-G  
--KR--NFWKKT--LFLPT--VASF--S-.-.-G  
AAKVK--RS--LLWKTSK--DTVER--RSF--S-.-.-G  
QVTDK--KN--ISWSRLFCGN--AEKF--S-.-.-G  
--KGWTKKR--SFSK--ISDY--V-.-.-G  
--RP--LRWKLRD--KFEEN--LVTL--Q-.-.-G  
KANKE--RKLRL--YKWKHGTINK--DVFF--D-.-.-G  
GKSA--RP--TWHKVDLNNTA--LFEY--Q-.-.-G  
RKKG--QS--LKWKAHN--I--KVGVTCT--SSVF--S-.-.-E  
QQRKL--EG--NNWVEGR--L--DNFTK--QMFF--S-.-.-G  
NATLK--KD--IKWFMKNDF--TQAE--S-.-.-G  
AKKKM--KV--YTWRKG--L--ALSP--T-.-.-S  
--P--NEE--V-.-.-D  
--TE--HDWNDGL--PFTT--PSFPCS--S  
RKVS--SQ--KWRKKQ--PEYTKL--ELK--D-.-.-G  
KRKTL--IF--RKWVKKD--I--QNW--DFNT--P-.-.-G  
AKNRR--ET--KWKRI--T--YDNPL--POTA--P-.-.-Q  
KKSIS--IE--RNWKS--I--LNVEF--IVF--S-.-.-G  
RHHQAH--HT--VTWMPA--SSGKTRLPF--EANF--S-.-.-Q  
KKQMI--KV--RDWKAQD--L--VTTNIPY--YKPF--M-.-.-A  
KKCKK--PE--KWTKKI--NFTGKS--STG--P-.-.-E  
KRSKKDGTPQ--KWMKKN--N--FEKPL--KSK--P-.-.-K  
QYTTF--EK--KWTKSD--F--SSASST--SNS--D-.-.-E  
KKAAS--PE--QWVKTD--I--REFDL--SW-.-.-G  
RKIER--KK--RLWKSQVD--IE--QMW--CD-.-.-G  
NMQKRA--DAKKVAHHKAVNRRNWKECKVWDDVRRSRS--DDVPRPQFOER--AIKF--V-.-.-LE  
NMQKKA--DAKKVAQHKAVNRRNWKECKVWSDVRRQSRA--DDSPRPQFOER--AIOT--A-.-.-LE  
RMQRKA--DAKLIAHHKAINKHWDVSYWTDVDEEYSNDDEGEPQFKEY--SHPF--T-.-.-TE  
KMQRKA--DAKLIAHHKAINKHWDVSYWTDVDEEDQENDDENQKPHNQY--SYPE--T-.-.-AKE

121  
127  
110  
103  
141  
156  
137  
120  
94  
95  
94  
100  
146  
109  
135  
158  
71  
68  
80  
163  
70  
41  
88  
88  
101  
158  
106  
140  
196  
126  
73  
119  
73  
51  
58  
196  
73  
80  
54  
130  
68  
65  
126  
148  
85  
125  
94  
94  
82  
100  
92  
517  
104  
80  
109  
156  
93  
533  
812  
121  
112  
343  
122  
105  
63  
89  
120  
167  
105  
105  
129  
129  
132  
118  
123  
149  
35  
273  
291  
288  
235



A-PiggyBac-13\_Smed  
A-PiggyBac-2\_Smed

B-PiggyBac-18\_Atri  
B-PiggyBac-19\_Atri  
B-PiggyBac-2\_Ptcp

C-PiggyBac-2\_Cgig  
C-PiggyBac-2\_Lvar  
C-PiggyBac-2\_Oedu

D-PiggyBac-1\_Oedu  
D-PiggyBac-3\_Bgla  
D-PiggyBac-4\_Twer

E-PiggyBac-1\_Lrub  
E-PiggyBac-20\_Acal  
E-PiggyBac-26\_Acal

F-PiggyBac-2\_Alon  
F-PiggyBac-2\_Hrob  
F-PiggyBac-3\_Aamp

# Pokey

A-PiggyBac-13\_Smed  
A-PiggyBac-2\_Smed

B-PiggyBac-18\_Atri  
B-PiggyBac-19\_Atri  
B-PiggyBac-2\_Ptcp

C-PiggyBac-2\_Cgig  
C-PiggyBac-2\_Lvar  
C-PiggyBac-2\_Oedu

D-PiggyBac-1\_Oedu  
D-PiggyBac-3\_Bgla  
D-PiggyBac-4\_Twer

E-PiggyBac-1\_Lrub  
E-PiggyBac-20\_Acal  
E-PiggyBac-26\_Acal

F-PiggyBac-2\_Alon  
F-PiggyBac-2\_Hrob  
F-PiggyBac-3\_Aamp

Pokey-PiggyBac-1\_Dpuli  
Pokey-PiggyBac-2\_Dobt  
Pokey-PiggyBac-2\_Dpuli

-E H G P - T A H A K R N I - M N G N L S A F L L I - D N H I L E H I - R I C T E S E  
 T P G R - T Y A K R N I - M K G S A S A F L I I - D R N I M E Y I - I K C T E A E  
 A D G E P - T A E A R R - S I T R I S L F C F I - T D M L G I I - R D C T V O I  
 L P G N - T Q F S - K - H V T S P I D A W R L I F - D S I I E M I - V K C E N T Y  
 V P G R - T G V A -  
 O P G V - T S E G - - R K D S I K E V F Q L Y L - C E E I L S V V - I R E T R E  
 P A G V - T A T S - R - R C D I I F D T V O L F - T P E I D G I - V L O T R E  
 P P G V - K V H A - E - N R E S I A E I E R L F - S E N I K V H - I R C N M K  
 L P G N - T A Y S - R - D V A S I D A W N V L F - D S N I M V H - V Q C I N I Y  
 L P G N - I G E A - K - N V S P I N A W A L I - D S M S I I L - V E C T I N I Y  
 L P G N - T A Y S - K - H V A S P V D A W N V L F - D S K M L N M - V E N I N I Y  
 G I N K V V L P G K - - H I D C S L D A E S L F F - N D N I N I I - V K F T N L I  
 Y N P G A - T P E A - K - A A A I L D F D L F - D D D M L N E - V H Y N I M  
 C P G R - T P G S - V A V S P K D A R D K F I - S D N I I E E V - K C T N L E  
 T P G L - K Q P A A K - N V K I E L A I G L V I - S Q D I M N I - L T H I R K - L D D  
 O P O V - T S E G - R K D I I K I V F Q L Y L - C E E I L S V V - I R E T R E  
 I P S V - H I Q F - D - D T S D V I F M E T I - D S S L M S K I - V E T I N K Y  
 K A G M - N F N I - D I C N V L E F F Y K F - D M L I S I I - I T E T R Y  
 K P G I - N F Q V - K - G I D N S L D F Q L F I - T E E L V E T I - V E T I N I Y  
 R I G P - Q R R Y - T - E N T I Y L E V E E F F - T E A A Q W L - V D M I N L Y  
 N A G I - T N D I L S V E E E G S I Y L D Y E C I I - T D N I I Q K I - V V E T R Y  
 H P G P - K H A P - A - D A K P D V Y N V N F L - T D D I L V N I - V N E T N K Y  
 O P R Y - L A R Y - D - E Q S P L D F V K L F L - T A E L M S I - V D F I K K Y  
 O P R -  
 S V G V D N - A E D C - R K M S A E Q L Q I F F - T D Y I F H L I - V G E T R Y  
 S K V G E P - Q I E Y - F C S P L O F Q L F F - T D E L I K K I - V S E T N K Y  
 K I G L - Q S D I - S - Q Q S P L D I E L L F - D E E I I N H I - V V E T R Y  
 T P G P - S E S A - R - R C V P A E F F G L Y I - G D T V M L N - V S E T N K Y  
 O Y G G G L K T D M - T K G F Y D F F H S F - T P E I Y T H V - A E T I N S Y  
 G R O P G I N P - A T G L - D - E N S P L H F G T L M - T S D I T D D F - I R S V N N Y  
 E K K I - N V E L - D - D D C M E Y F E G L I V - T O E F L D E V I O E T N K Y  
 R E K L - L F D I - T D Y E P D V D Y S Q F F - D E V F E L M - A T O I N L Y  
 E K K I - N V E I - P - E H A N M I D F N V L I - T D D I E N I L V O E T N K Y  
 N P G V - K V E I - H S S P L E F F G I F F - D D D I S F I - A S E T N R F  
 T P G I - S S S A - K N F G D S D D F M R F S L F - D N Q V M S I - V E I T R Y  
 M P G V C P - D L H L - S - D Q S P L D F F H A I F - D D R I K D N I - I Y S I N S F  
 N A G M - N F N I - D I S N V L E F F Y K F - D E N I I D I I - I T E T R Y  
 V G G A - T I Q I - P - E E A A G H Y E L F W - T N E L L D R - V R E I N I Y  
 K P G P - K N F R - V - E N E O P I D Y F E W I - D S E F M D V Y - V K E I N L Y  
 K S G V N S - E L D L - T - R D S P E D V E T R L V - D C S I M T F L - V D S I N D Y  
 K S G L - C K E L - D - D C D P R K I E L F I - D D S D E N I - S E E T R Y  
 N A G P - R E H V P P - R N S R P I E Y F L F M - T I D F L R Q I - I T E T R Y  
 E P G I N - E N Y L - S - Q S S L D F D C S S L F - T C T I M D I V - I E Y I N A Y  
 I A G A K M P R H I - S - A Q S A I D F D L F L - D D D F W E T F - C E E T N R R  
 R I G P - L L I N - D - D E S A C E I F S H I F - T E D F L N C I - V I E T N R F  
 K P G R - Q I E V - A - D T L D I E Y N F L F - I D E I L D K I - V I E T N R Y  
 O P G P - T Q T L - E - A D K N E I D F N L L F - P E E L Y S K I - S E E T N A Y  
 O P G P - T Q I L - E - A D K E L D F N L L F - D E F Y T T I - S E E T N S Y  
 I C G P - T H D L - P - Y D A P F D Y S E L I - P E N F Y E I - A V O T N L Y  
 M G P - I H D L - P - P G S E P I D Y E K L F - T D S M C E T V - R R N S K Y  
 L S G P - I H N L - P - T G S A L Q Y K L Y L - T D E I C E K M - R L N I N K Y  
 O I D D - T T D K - R - V D W N P D Y Q E F F - D O D F E Q V - S R A I N V N  
 N D I - P G G L - L - Q I O P P Y O F S Y F V - S E D I A K I - V K D I N L Y  
 N T E V - S Q E I - M - N L D I P O F E S Y F - G E E I L R F L - V D S N K Y  
 V E D D - A H E A - R - A D W K P L D Y M Q W L - D T I E K L V - S H S I N V N  
 D E S E - G D Y - V - D L K P I Q I F E R K F - V T I E Q H I - V E T N L Y  
 V A G P - D Q N - A - S V L S P Q V Y K R V I - P D E F O L M - A D M I N L Y  
 V V D D - D H A - R - A E W S M D Y F Q V I - D T E F L E M S - S C C I N V N  
 O I D D - T T D K - R - V D W N P D Y Q E F F - D O D F E Q V - S R A I N V N  
 T I D V - K E N I - G - L M Q H P V D F F N Y F - T E L L K L I - S E E T R Y  
 H S G P - - D - N V D P P Q V I R I F - D A Q I S H I - T Y O T N L Y  
 P N D K I - P A E I - L - L L K P I D Y F L H I F - S F O L R L I - V E S N L F  
 E E D R - S Q E V - V - V D K P I E Y F Q R V Y - T P T I F E D F - S K Y T N M Y  
 R I W N - P K D V I E - L R E S P V D L E T F F - D A E V F M I - V T D S N N Y  
 K N L E - T K H O - L - I L L P E F M E L K F I - P I E Y V E E L - A O D K I Y  
 S T A S C H N N E G D R A R - K H - O R G O T E D - - A R A K R O R V O S - S Q E E F K  
 A - D R R E Q A - L K E K - L - E G A P V O L E E M F - S S E M Y E H I - I K E I L R Y  
 - E K S E - T - I L D N T A E F F F - D D D I C T F L - A E M I T L Y  
 K I C E - S N K - L - I F L P I E L M K F I - P D Y M Q E L - A L E I R L Y  
 - E N R E - F - E N S P H T I E K L F F - D E E I K F I - I D M S L Y  
 - F - S G M P N E L V T L F L - G E E I F D L I - I K S S L Y  
 - D - I P R P C E I V E L F L - D I L A I E N I - V K Y I V N Y  
 K I R E - K Y E I - L - C S K S P N H L F K L Y - D N E L R M T - V N I V K Y  
 S I S O - V D A N - L - I Y K S P F E I F I Q L I - G E D Y L D Y I - A Q M I L Y  
 D L Q K - I K D N - L - K D L S R Q I E K F L - S M D I T N Y I - C H D I I Y  
 T A S O - T N T G - T - T D L S P A S L E L F F - D D E V I E H M - T S M S L Y  
 V R A N - E E H E - V - D Y L P V H F F E Q F - D E S M L D I - V L N I E K Y  
 R P G P V - L H Q F - S - T S N P I E V Q T M L G G E S L S L L - R E S I N D Y  
 E P G P V - L S Q F - S - R F S P L G V F K S M L G G E D I L Y L L - R E A I N D Y  
 Y V G V - F S K E - E - R N D I P T I E F E L G G H O L L D L L - L E K I N K R  
 P V G R V - F S K E -

IS RV LK G - - - - - NWT - - - - - I T Q E K L K A F L A I L Y A R G A Y  
 R F V F K - - - - - KWT - - - - - L T E E K L A F M A I V C A R G A Y  
 K F T D V - - - - - DWF - - - - - M G L S L F A P I S I I M R G I T  
 E S I S N F N T R - E - - - - - R - - - - - D A K F L - - - - - I K E F E C A F V G L L Y I A G L I  
 E R C Y R E W N S - - - - - I H Q D N Q K - - - - - R W K T F - - - - - D W T E C E A F I G L L L A G V Y  
 R R R I R A W N E - - - - - Q N P E N Q R A - - - - - E W K F V - - - - - N D K E M I A F I G L C L A G V Y  
 E S V Y Q K N S - - - - - K R I S L R F N - - - - - G F O L L - - - - - E E M E V E A I G L L I F Q G L C  
 D S V R E R F T R - E - - - - - R - - - - - D A K E T - - - - - D E T E I K A F L G L L Y C G L I  
 Q S I A C K F P R - E - - - - - R - - - - - D A L H T - - - - - K N S E I K A F I G L L Y P G G L I  
 E S I Q E R F T R - E - - - - - R - - - - - D A R K T - - - - - D E T E I K A F I G L L Y C G L I  
 R T V L K - - - - - - - - - - - N W K E T - - - - - D Q M E I L A I G L L I D A G L K  
 E E K E K R G F A K D D - - - - - Q - - - - - S Y S K T - - - - - V T E I T R A F I G L I T Q A G A K  
 R R A A A V K K - - - - - - - - - - - D W K S I - - - - - D K E E F L A F I D L I L A G G D  
 R I I A E K S - - - - - S D E Q R K K K Y - - - - - I L A E L - - - - - D E T E L R A F I G M V L R G I  
 E R C Y R E W N S - - - - - N H Q D N Q K - - - - - R W K T F - - - - - D W T E C E A F I G L L L A G V Y  
 K D S I Q S S V A - - - - - R Q F S K S - - - - - F W E E T - - - - - V E E L H V F F A I N I L G V I  
 E R K A R R L N - - - - - S K - - - - - P W C S T - - - - - S E N E I R V F L G I I L Q G V I  
 E E F L R K N R S - - - - - V L K F R S R V H - - - - - K W K F V - - - - - V T E I W I L Y L L L L L G V I  
 E S K R E N T - - - - - - - - - - - K N R G - - - - - K W E N V - - - - - G T E M K V F I A L V I S L G I I  
 A T Y S E T H D - - - - - L P S H S R Y R - - - - - K W T D T - - - - - I T E M K A F I A M I A M G L V  
 R A R F I E D N H E N L - - - - - E T T P R S R V H - - - - - K W T F I - - - - - K E E F R A F L G V M N M G L N  
 N K V I S A A K N R Y A R D H N G E A I L S P R S R Y R - - - - - R W T L K S Q E L N V I M L A F L A L F L N M G I  
 N K V I S A A K N R Y A R D H - G E A I L S P R S R Y R - - - - - O N T K L S Q E L N V I M L A F L A L F L N M G I  
 G C R Q H E K - - - - - - - - - - - K G R K H S - - - - - F W E V E - - - - - I T E K L W G L L L I N G L V  
 A N I L A T K N - - - - - I S T Y S I W K - - - - - T W T D V - - - - - N E I M K A F L G V V I N M G L  
 G C I S S Q K - - - - - L E H S R I N - - - - - R W N E T - - - - - N H E E M K K F L O L M M W M G L V  
 M G S R H D T S T M - - - - - - - - - - - S W V E - - - - - I R O E M A A F L G L I A M G V A  
 L I Y F D D P L - - - - - E L L I N S R L W - - - - - E W C E T - - - - - N P G E I R A F V A L E M A M G L C  
 E H M I V K N S P - - - - - A L S R S R F N R - - - - - D N W N H - - - - - E Y E W L K F L A V I N M G I D  
 A D F F N S P G - - - - - R N L K P Q S R F R - - - - - K W D V D - - - - - D I D D M K R F I A I V I M G L V  
 K K T I E R L G V - - - - - L Q O H S R L - - - - - K W T D T - - - - - I P A E L K A F I A M O M A M G L V  
 Q D D F F N S P G - - - - - O N L K P Q S R F R - - - - - K W N V A - - - - - I S D D M K R F I A M O M G L V  
 E D F I E N N E - - - - - L T P S S R L - - - - - D W R D T - - - - - D S S E I R V F L A L I L Q G L I  
 E E F F N K S D - - - - - L T P S S R A L - - - - - S W K N T - - - - - D I K E L R Q F G L L L L G I M  
 R K K C Q L N S D - - - - - P R K R S V F G - - - - - R W T D V - - - - - I R S E L D K F M A V L I K I G I E  
 E R K A R R L H - - - - - S K - - - - - P W C S T - - - - - S Q N E I R V F L G I I L Q G V I  
 H E R E K N E P - - - - - P H Y A A - - - - - K W T F I - - - - - E K N E L K A F L A C F A M G L I  
 Q Q H - - - - - P L I S Q K M A - - - - - K W D V - - - - - I S N E L S Y F A I V M L I G L Y  
 K I V I Q K H N P - - - - - P T V R S T F N - - - - - N W T D T - - - - - N V A E M K Y F A V F I I G L O  
 A D F L H D K V - - - - - L E K S R F Q - - - - - K W D T - - - - - C A S E M K K F A I L A M G L I  
 S P I E S R E R - - - - - I R R F S R L H - - - - - E W Y K I - G V V - - - - - I T E L K A F F A V I L N M G I  
 L K K V Q N T P - - - - - L R R R S R F Q - - - - - N W K F V - - - - - I K Y E M I K F L A M A M G L I  
 S V K Q K N - - - - - - - - - - - S Y A - - - - - K D F I L L - - - - - I V P E L K A F F G L R L O M E Q C  
 A S I A N A V - - - - - L P H A R A N - - - - - K W T D V - - - - - I N D M Q A F L A L I M I G L V  
 Q L M E A P G - - - - - L R R R S R M N - - - - - N W S D T - - - - - R D E V R V L F A L I Y O G I I  
 Q L C I R A K A N - - - - - P - - - - - G W Y D T - - - - - I P E E I R A F L G C L V M G I I  
 Q I C I R S K A N - - - - - S - - - - - G W Y N T - - - - - I P E E M R A F L G S V M G I I  
 N Y R Q Q K E K - - - - - V D R - - - - - A W O P T - - - - - I A S E I K L F H I Y I M G I I  
 E Y I Q R S K N I - - - - - E D K - - - - - K W M P I - - - - - I C C E E I W N I S I L F I M S I  
 D Y C A K O R Y - - - - - E D K - - - - - S W Y E I - - - - - A S I K E I W A F F T V F M S L V  
 T L L T L - - - - - - - - - - - K S L D T - - - - - I P A L M M I F F G M N L M M S C L  
 V K H A D - - - - - P M A F - - - - - I T S D I K Q I I G V I V F M S V  
 F K N N - - - - - F I P V - - - - - I V L E R K F I G I L I F S Y V  
 V A Y S G - - - - - R S L N T - - - - - I S E I Q R F V G A S I L M S L  
 V I R I R E - - - - - K P L K L - - - - - I V L E E K F L O I M M M S L  
 V T N N T R - - - - - K H S T - - - - - I A N E M V L V G L H M S G L I  
 T V A T G - - - - - R S L N T - - - - - C Y T E I F E F L G A I Y M S A I  
 T L L T L - - - - - K S L D T - - - - - I P A L M M I F F G M N L M M S C L  
 F I L R Q - - - - - K L W S V - - - - - I L T D I Q G F I G A G M L M S I I  
 V K D I N - - - - - T F S T - - - - - S E N E I M K F A I L I Y M G V V  
 V O O T G - - - - - S L F G V - - - - - S E E V E Q F I G I H I L T G I V  
 T O O R E - - - - - K P L K L - - - - - I D N E L Q O F L G C V L W M S L I  
 A L K G I - - - - - S F K P C - - - - - K E E I E I V V G L H I I M G S L  
 A A R K N - - - - - K N L D M - - - - - V E E L K C F I G I L L S O Y V  
 A M K G - - - - - F E Y E I - - - - - I R K I G O F F G L L L F S O Y H  
 K L V T K G - - - - - K Q L N L - - - - - S M D E L L I F X G I L I A S O Y  
 S A T K N D - - - - - P L F S M - - - - - I A E K L F I G I L I L S O Y  
 R V K H D - - - - - H A F E T - - - - - D A E E I R C F A L I L L L S O Y  
 L R G - - - - - C Q Y E I - - - - - G C F I A O F G L L L F S O Y H  
 S A K L - - - - - K Q L N A - - - - - I E E E M K F L A V L L L S V A  
 L L R N G R - - - - - Q D Q O L - - - - - S R E D I A F I G I L V L T S V A  
 V N G N - - - - - H F F T L - - - - - I S D E M K F I G I L L V S O Y  
 G D K N N - - - - - N K F E F - - - - - N H L D I D K F V G I L L T G Y H  
 R O K L - - - - - S S V D T - - - - - I A D E L V R F G I I I F S O Y H  
 R D K N N - - - - - H F F T I - - - - - E P E E L R F L A I L Y F T G Y N  
 S O H S - - - - - R Q L G V - - - - - I E E I R L V L S I L L I S O Y V  
 I I K K K - - - - - H Q F S T - - - - - S A S E I K A C I A L L L S O Y S  
 A E F W N Y R K T - - - - - P P S R K V G G K P E G R R I G P V L P A G G L V D H E L A A F F G I O F I I G Y H  
 A E F W N S R K T - - - - - P P S R K V G G K P E G R I G R L P A G G V D H E L I A F F G I O F I I G Y H  
 R D S W S Y V K K - - - - - G D P P S R K F G G R P E G K E S S L P G - G L V D K Y E L V A E L G I O F L M G L H

NNLRLQYLWNV --- KWGPFSSNTMSRRDFTETILRYIRFD --- KKNQ - 112  
 KNLKLSYLWNK --- KWGPKFADTMSRRDFTETILRYIRFD --- NKNS - 112  
 P - SLRDCWSK - NLGSGRIETMSRRDFTETILRYIRFD --- DRDT - 108  
 HVNVRDLWATD - GTGLDIFRKTNNYKRFQILRLVLRFD --- D1KT - 116  
 8  
 NQESLEELWSR - KYGRPIFLATMSLKKRFQILHYCRFD --- NKNT - 119  
 NHREPOSSLWE - REGRPVEVATMSRDFRCIMKYRFD --- DKAT - 120  
 RETKHELWT - LSSHPYRAVMSRDFKLLKFLRFD --- DFHT - 120  
 HTNKLKDLVATD - GTGLDIFRKTMSRDFELFLMRCFLRD --- NIND - 116  
 HVN - GPLATD - GTGLDIFRKTMSYKRFELFLMRCVFRD --- D1RD - 114  
 HTNKLKDLVATD - GTGLDIFRKTMSRDFELFLMRCFLRD --- NIND - 116  
 GLFDDEFWTD - LFGQTYLRACMSRNFPAALSRLRFRD --- D1LS - 112  
 NHRTVEEMFSN - OHGAPLYRAVLARRNFNLLRCLFRD --- DTTD - 119  
 WQVALREFLFD - ELONPILYKATMGVGRNENRFRFRD --- DRRT - 112  
 P - GVDLFSR - KNGPILFLRAAMGQQLALLAHFRFD --- D1AT - 123  
 NQESLEELWSR - KYGRPIFLATMSLKKRFQILHYCRFD --- NKNT - 119  
 P - GDHYSWKRY - SINTNPFFSIKMSRDFCLQIRYHFS --- D1NAEF - 121  
 Q - DLDQYSKQ - LWNTPFGAKTMSYRRCQIKQNLHFN --- NDNDAY - 114  
 P - VAWYWKKK - ILSTPFGAEVMSRDFSLISKFLHS --- NNEMT - 123  
 P - TLGAYWKKK - WFDIPSFNMVMSRDFNQIWRYHFC --- NETAA - 119  
 L - DLDQYSKQ - VINTNPFERSVMSRDFSLISVHLFA --- D1NSGA - 127  
 P - NNAYWDS CN - LSQETFWFVHMNRDQVQILKFLHFA --- DNTLL - 126  
 P - SVSDYWNQDD - WSQFTPCWAE --- - - - 116  
 P - SVSDYWNQDD - WSQFTPCWAEVMPDHELLLMREFLOFY --- D1CED - 104  
 K - RLGEYWSHFN - LSTDPGFSVTMNRNLFHLIRYHFN --- NNED - 121  
 P - ELQDYSWTHF - HSNIPFGRIFFRRMFQILRWLHLK --- T1JK - 121  
 P - RLEDYWSQNG - VYNNTPDRAIMSNKQFQILLTMLHFN --- NNET - 120  
 P - E1HDYWSTE - ALLEGWYSVMPDRDFTQILRLHCS --- GT1SK - 116  
 P - ALSSVFEKYW - L1ATPAFGVTMSRNFQOLRSLFHMN --- VNDVR - 125  
 P - SIRDFSTAD - NLYTFGYHMKFORFETIYSMLHFN --- D1PGA - 128  
 Q - DLDQYSKDE - M1RTPFGNTMKNKLLFLMLHFN --- NDNDQ - 125  
 P - ADQYWEENW - L1LTPGFSVTMCKNQLVLLNMLHLV --- D1NELR - 121  
 H - DLDQYSKDE - M1LETFFEGKTMSRKNLFLMLSLHFN --- NDNDQ - 125  
 P - IQKLYWSQNG - F1YTFFGQIMSRNFRFALLMKFLHFT --- NNAT - 120  
 P - VEAWNYSIR - V1NTPFGQIMSKKSLMLKFLHFE --- NSDEF - 125  
 P - ALSDYWTAA - EFYAFWIHVNIRKDFD1YHMLHCG --- DEAS - 124  
 P - DLDQYSKQ - L1NTPFGAKTMSYRRCQIKQNLHFS --- NDNDAY - 114  
 P - EKTDRWSQK - WMFVTFNHVMSRDFHQIWRRLHFN --- NNEEQ - 119  
 N - EKDYSWVD - L1NTPLEKFTTNKFLQIMRLHFLHA --- NNEQ - 116  
 K - SVRDFWSKND - I1YQVWNTMTARFELFFSFMHVG --- D1EVS - 124  
 M - DYSEYWTYN - V1STDFPSVMSRDFLLLLALINLN --- D1NSNH - 121  
 P - V1SEYWNTKC - ASQSTKWRDMTNRNFQILRLKFLHV --- D1NTT - 127  
 P - S1QDYFSTD - I1FTPFSEMEERDFSLFPCSMHCG --- D1EDA - 123  
 P - R1MEDYSSSSKSF - L1ETPGFRSMDRDFSLVYTHLHFV --- NELN - 124  
 P - S1MEDYTTDN - I1LEMPGLRSTNRNFEELISLHLN --- NNANN - 120  
 P - EMSFWSYTK - L1ETPYVRQIMSKRFSLSLWKLHFN --- D1NTTL - 121  
 P - AQDLYSKDK - L1FLHSCEIERTFRFENQOIRYHFA --- D1TRQN - 116  
 P - AQDLYSKDK - L1FLHSCEIERTFRFENQOIRYHFA --- NT1QN - 116  
 P - EKMSWASDE - LR1RVDGVA1SMGRTFEKLSQYHFN --- D1ATTF - 117  
 P - SLKYSWSNR - M1GNSL1KETMSRDFMKILRYHLS --- DREME - 117  
 P - RLTDYWAKTA - T1GNRVSMSMGMHFLK1KHYHFS --- DRESE - 118  
 P - SVRMVWKS - L1RVR1LSEAMGNRFRIRSLFKVYV --- IDAH - 107  
 P - N1RCYSWK - L1YQVPYNSVMNVEKRLRYHFN --- D1NSTF - 109  
 R - SVRSWSNI - K1FED1AQTNMRNDFDKIRQ1FMN --- D1DSKH - 109  
 P - H1KMFQHS - LR1P1IAKTIRNDFRIRN1KLVV --- VD1D - 108  
 P - SARRWNAK - K1VNNVSEVMNVEWEEKIRYHFN --- D1NTA - 108  
 P - RVRMWSGL - MK1V1EVSGMSRDFFKR1SNWIFV --- NNL1 - 110  
 P - RVNMFQNN - RV1Q1ADV1TRKFFKIR1SNLKVV --- ID1S - 107  
 P - SVRMVWKS - LR1V1LSEAMGNRFRIRSLFKVYV --- IDAH - 107  
 P - Q1RMWR1E - FL1VA1E1ANF1VKKFE1K1RFLHFA --- D1NTV - 108  
 P - S1VEDYAME - R1R1OVANLMSRKRFLK1RL1HFN --- D1NTQ - 105  
 P - SVRQWADA - R1R1S1ADVMRNRDFKRL1HFN --- D1NSKM - 101  
 P - S1RRYRAR - YD1KV1ST1K1R1K1R1YHFS --- D1NS - 108  
 P - RYSLYWDKT - I1GLT1FT1MA1DR1FQ1L1R1HFN --- D1VND - 107  
 P - R1RMVWQSE - D1HNS1VA1N1K1DE1M1SCLHT --- D1NDR - 109  
 P - N1NLW1STSH - DM1N1Y1Q1M1P1NS1K1K1QYHFN --- D1NSK - 108  
 P - R1RMVW1DN - DYHNE1S1S1AM1R1ED1M1A1YHFN --- D1NSK - 119  
 P - S1RHHWSLED - DL1GE1Y1RR1MS1R1K1K1AYHFN --- NNET - 113  
 P - R1RMVW1EDT - E1FNS1V1SR1MR1R1D1K1RYHFS --- D1NSH - 106  
 P - N1KMW1STS - DM1N1Y1Q1M1P1NS1K1K1QYHFN --- D1NST - 108  
 P - N1RMVW1EQSN - DVHNL1V1SN1S1V1N1FEEL1R1HFC --- D1NEK - 104  
 V - N1RFYWEAA - D1HNL1IQ1AM1R1N1D1K1RNLHFS --- SEED - 101  
 P - Q1RLW1QKO - DYHNE1I1AES1MR1N1DE1M1K1H1AA --- D1NTK - 101  
 P - R1RMVW1NDE - D1R1T1FA1EQ1MS1R1F1K1RYHFN --- D1NDK - 109  
 P - E1DHYW1TAD - D1LSN1I1SK1VMS1R1K1R1K1FLHFN --- D1NLN - 107  
 P - R1ERLW1SLDE - DL1GVS1CVY1NMS1R1LE1K1RFLHFA --- D1SK - 109  
 V - N1RMFWESE - D1HNE1V1S1AL1PLN1FEEL1RFLHVC --- D1NDN - 108  
 P - R1RMVWERSE - DC1G1K1AVY1NMS1R1N1FEEL1RYHLS --- D1NNN - 110  
 P - E1LSMFWEQDD - TG1GLG1I1Q1AM1R1K1K1K1H1ACAS1WSD1S --- VSDSDS - 145  
 P - E1LSYF1WQDD - TG1GLG1I1Q1AM1R1K1K1K1H1ACAS1WDD1V --- YD1NS - 143  
 P - E1LSMYWERO - D1SGY1GLG1I1YH1Q1AM1R1K1K1K1H1ACAS1 --- D1HDEL - 139



A {  
B {  
C {  
D {  
E {  
F {  
Pokey {

A-PiggyBac-13\_Smed  
A-PiggyBac-2\_Smed  
A-PiggyBac-3\_Trub  
B-PiggyBac-12\_Aaur  
B-PiggyBac-12\_Acal  
B-PiggyBac-15\_Acal  
B-PiggyBac-16\_Acal  
B-PiggyBac-17\_Acal  
B-PiggyBac-18\_Atri  
B-PiggyBac-19\_Atri  
B-PiggyBac-2\_Ptep  
B-PiggyBac-3\_Smed  
B-PiggyBac-4\_Csap  
B-PiggyBac-4\_Tbim  
B-PiggyBac-5\_Aamp  
B-PiggyBac-5\_Lrub  
C-PiggyBac-10\_Atri  
C-PiggyBac-14\_Atri  
C-PiggyBac-16\_Atri  
C-PiggyBac-1\_Agra  
C-PiggyBac-1\_Airr  
C-PiggyBac-1\_Bgla  
C-PiggyBac-1\_Lpic  
C-PiggyBac-1\_Lvar  
C-PiggyBac-1\_Ppalm  
C-PiggyBac-20\_Atri  
C-PiggyBac-21\_Atri  
C-PiggyBac-27\_Acal  
C-PiggyBac-2\_Agra  
C-PiggyBac-2\_Bgla  
C-PiggyBac-2\_Cgig  
C-PiggyBac-2\_Lvar  
C-PiggyBac-2\_Oedu  
C-PiggyBac-3\_Aaur  
C-PiggyBac-3\_Atri  
C-PiggyBac-4\_Bgla  
C-PiggyBac-4\_Lbes  
C-PiggyBac-4\_Oedu  
C-PiggyBac-4\_Smed  
C-PiggyBac-5\_Bgla  
C-PiggyBac-6\_Cvir  
C-PiggyBac-6\_Mvir  
C-PiggyBac-7\_Bgla  
C-PiggyBac-8\_Bgla  
C-PiggyBac-8\_Lrub  
C-PiggyBac-9\_Lrub  
D-PiggyBac-1\_Cgig  
D-PiggyBac-1\_Oedu  
D-PiggyBac-3\_Bgla  
D-PiggyBac-4\_Tver  
D-PiggyBac-6\_Aaur  
E-PiggyBac-11\_Lrub  
E-PiggyBac-11\_Smed  
E-PiggyBac-12\_Smed  
E-PiggyBac-19\_Acal  
E-PiggyBac-1\_Acal  
E-PiggyBac-1\_Lrub  
E-PiggyBac-20\_Acal  
E-PiggyBac-26\_Acal  
E-PiggyBac-28\_Acal  
E-PiggyBac-2\_Ppale  
E-PiggyBac-4\_Lrub  
E-PiggyBac-7\_Lrub  
E-PiggyBac-7\_Tver  
F-PiggyBac-10\_Acal  
F-PiggyBac-1\_Alon  
F-PiggyBac-1\_Tbim  
F-PiggyBac-2\_Aamp  
F-PiggyBac-2\_Acal  
F-PiggyBac-2\_Alon  
F-PiggyBac-2\_Hrob  
F-PiggyBac-3\_Aamp  
F-PiggyBac-3\_Csap  
F-PiggyBac-3\_Hrob  
F-PiggyBac-4\_Hrob  
F-PiggyBac-5\_Hrob  
F-PiggyBac-6\_Acal  
F-PiggyBac-6\_Bgla  
Pokey-PiggyBac-1\_Dobt  
Pokey-PiggyBac-1\_Dpuli  
Pokey-PiggyBac-2\_Dobt  
Pokey-PiggyBac-2\_Dpuli

144  
144  
140  
148  
21  
151  
152  
152  
148  
146  
148  
148  
144  
153  
144  
144  
155  
151  
153  
146  
155  
155  
150  
160  
158  
136  
135  
152  
152  
149  
148  
158  
153  
158  
154  
158  
152  
157  
149  
146  
148  
144  
149  
154  
160  
148  
155  
153  
154  
149  
149  
150  
150  
151  
139  
141  
141  
140  
137  
140  
139  
134  
135  
133  
133  
135  
136  
138  
137  
146  
144  
135  
137  
133  
128  
132  
138  
135  
139  
137  
139  
180  
178  
174

A-PiggyBac-13\_Smed  
A-PiggyBac-2\_Smed  
A-PiggyBac-13\_Trub  
B-PiggyBac-12\_Aaur  
B-PiggyBac-16\_Acal  
B-PiggyBac-15\_Acal  
B-PiggyBac-16\_Acal  
B-PiggyBac-17\_Acal  
B-PiggyBac-18\_Atri  
B-PiggyBac-19\_Atri  
B-PiggyBac-2\_Ptep  
B-PiggyBac-13\_Smed  
B-PiggyBac-13\_Csap  
B-PiggyBac-2\_Thim  
B-PiggyBac-5\_Aamp  
B-PiggyBac-5\_Lrub  
C-PiggyBac-10\_Atri  
C-PiggyBac-14\_Atri  
C-PiggyBac-16\_Atri  
C-PiggyBac-1\_Agra  
C-PiggyBac-1\_Airr  
C-PiggyBac-1\_Bla  
C-PiggyBac-1\_Lpic  
C-PiggyBac-1\_Lvar  
C-PiggyBac-1\_Ppaln  
C-PiggyBac-20\_Atri  
C-PiggyBac-21\_Atri  
C-PiggyBac-27\_Acal  
C-PiggyBac-2\_Agra  
C-PiggyBac-2\_Bla  
C-PiggyBac-2\_Cgig  
C-PiggyBac-2\_Lvar  
C-PiggyBac-2\_Oedu  
C-PiggyBac-3\_Aaur  
C-PiggyBac-3\_Atri  
C-PiggyBac-3\_Bla  
C-PiggyBac-3\_Lhes  
C-PiggyBac-3\_Oedu  
C-PiggyBac-3\_Smed  
C-PiggyBac-3\_Bla  
C-PiggyBac-3\_Cvir  
C-PiggyBac-6\_Mvir  
C-PiggyBac-8\_Bla  
C-PiggyBac-8\_Lrub  
C-PiggyBac-9\_Lrub  
D-PiggyBac-1\_Cgig  
E-PiggyBac-1\_Oedu  
D-PiggyBac-3\_Bla  
D-PiggyBac-3\_Tver  
D-PiggyBac-6\_Aaur  
E-PiggyBac-11\_Lrub  
E-PiggyBac-11\_Smed  
E-PiggyBac-12\_Smed  
E-PiggyBac-19\_Acal  
E-PiggyBac-1\_Acal  
E-PiggyBac-1\_Lrub  
E-PiggyBac-20\_Acal  
E-PiggyBac-26\_Acal  
E-PiggyBac-28\_Acal  
E-PiggyBac-2\_Ppale  
E-PiggyBac-4\_Lrub  
E-PiggyBac-7\_Lrub  
E-PiggyBac-7\_Tver  
F-PiggyBac-10\_Acal  
F-PiggyBac-1\_Alon  
F-PiggyBac-1\_Thim  
F-PiggyBac-2\_Aamp  
F-PiggyBac-2\_Acal  
F-PiggyBac-2\_Alon  
F-PiggyBac-2\_Hrob  
F-PiggyBac-3\_Aamp  
F-PiggyBac-3\_Csap  
F-PiggyBac-3\_Hrob  
F-PiggyBac-4\_Hrob  
F-PiggyBac-6\_Acal  
F-PiggyBac-6\_Bla  
Pokey-PiggyBac-1\_Dobt  
Pokey-PiggyBac-1\_Dpuli  
Pokey-PiggyBac-2\_Dobt  
Pokey-PiggyBac-2\_Dpuli

# Pokey



A {  
B {  
C {  
D {  
E {  
F {  
Pokey {

A-PiggyBac-13\_Smed  
A-PiggyBac-2\_Smed  
A-PiggyBac-3\_Trub  
B-PiggyBac-12\_Aaur  
B-PiggyBac-12\_Acal  
B-PiggyBac-15\_Acal  
B-PiggyBac-16\_Acal  
B-PiggyBac-17\_Acal  
B-PiggyBac-18\_Atri  
B-PiggyBac-19\_Atri  
B-PiggyBac-2\_Ptep  
B-PiggyBac-3\_Smed  
B-PiggyBac-4\_Csap  
B-PiggyBac-4\_Tbim  
B-PiggyBac-5\_Aamp  
B-PiggyBac-5\_Lrub  
C-PiggyBac-10\_Atri  
C-PiggyBac-14\_Atri  
C-PiggyBac-16\_Atri  
C-PiggyBac-1\_Agra  
C-PiggyBac-1\_Air  
C-PiggyBac-1\_Bgla  
C-PiggyBac-1\_Lpic  
C-PiggyBac-1\_Lvar  
C-PiggyBac-1\_Ppalm  
C-PiggyBac-20\_Atri  
C-PiggyBac-21\_Atri  
C-PiggyBac-27\_Acal  
C-PiggyBac-2\_Agra  
C-PiggyBac-2\_Bgla  
C-PiggyBac-2\_Cgig  
C-PiggyBac-2\_Lvar  
C-PiggyBac-2\_Oedu  
C-PiggyBac-3\_Aaur  
C-PiggyBac-3\_Atri  
C-PiggyBac-4\_Bgla  
C-PiggyBac-4\_Lhes  
C-PiggyBac-4\_Oedu  
C-PiggyBac-4\_Smed  
C-PiggyBac-5\_Bgla  
C-PiggyBac-6\_Cvir  
C-PiggyBac-6\_Mvir  
C-PiggyBac-7\_Bgla  
C-PiggyBac-8\_Bgla  
C-PiggyBac-8\_Lrub  
C-PiggyBac-9\_Lrub  
D-PiggyBac-1\_Cgig  
D-PiggyBac-1\_Oedu  
D-PiggyBac-3\_Bgla  
D-PiggyBac-4\_Tver  
D-PiggyBac-6\_Aaur  
E-PiggyBac-11\_Lrub  
E-PiggyBac-11\_Smed  
E-PiggyBac-12\_Smed  
E-PiggyBac-19\_Acal  
E-PiggyBac-1\_Acal  
E-PiggyBac-1\_Lrub  
E-PiggyBac-20\_Acal  
E-PiggyBac-26\_Acal  
E-PiggyBac-28\_Acal  
E-PiggyBac-2\_Ppale  
E-PiggyBac-4\_Lrub  
E-PiggyBac-7\_Lrub  
E-PiggyBac-7\_Tver  
F-PiggyBac-10\_Acal  
F-PiggyBac-1\_Acal  
F-PiggyBac-1\_Tbim  
F-PiggyBac-2\_Aamp  
F-PiggyBac-2\_Acal  
F-PiggyBac-2\_Alon  
F-PiggyBac-2\_Hrob  
F-PiggyBac-3\_Aamp  
F-PiggyBac-3\_Csap  
F-PiggyBac-3\_Hrob  
F-PiggyBac-4\_Hrob  
F-PiggyBac-5\_Hrob  
F-PiggyBac-6\_Acal  
F-PiggyBac-6\_Bgla  
Pokey-PiggyBac-1\_Dobt  
Pokey-PiggyBac-1\_Dpuli  
Pokey-PiggyBac-2\_Dobt  
Pokey-PiggyBac-2\_Dpuli

YKSKFN--KVLVLLSKKHKIKIDKAAK--  
YKSKFO--KVLVLLSKKHKSQVINKNK--  
YAFKRK--RTVYVLSMMSMIQIQDTTK--  
YMTKKN--NCVNLLSTMHNDNHIDESTG--  
YVFKKG--KSVILLSSMHTDAQISNRE--  
YVFKKG--KSVILLSTMHDKVVDGLK--  
FVFKPG--KAVLAISTLHHDATDAQMS--  
WVFKRH--KTVLLSSMHHDAAVID--  
YAAKKN--KNVVMLSMHTDDKIDETTM--  
YVKKKN--KCVVLLSMHNDSDASTA--  
YSAKKN--KNVVMLSMHTDDKIDETTM--  
YVKKKN--RAVLLSTMHHTSEVDNTN--  
YKAKMN--KIVLLSSYHHEEIDGSEN--  
YVFKKG--KSVVLLSTMHDDKAVDES NHK--  
YCFRRG--KVVLVASTMHKQSLIDORS--  
YVFKKG--KSVILLSTMHDKVVDGLK--  
WMDK--KKVSLISTIHNTENVQIQV--  
WKDK--KDVSLISTIHTIDMDVNTNR--  
WKDK--KDVHLLSTIHNIEMSKVSCN--  
WLDT--KAVYFLSTMHPPIHPDTPRELRFVKRRGGQD--  
YADK--KDVHLLSTIHKGVMEDSGKDDQE--  
YQUN--SRKPIILLSTASKAGLIDTVNSR--  
FRQKASQKPGVCLLSTKGSARWYKKKTGEN--VTTAD--  
FRQKASQKPGVCLLSTKGSARWYKKKTGEN--VATAD--  
--KTCAYVKLKR--  
WCDT--RVVTLLSTETSDSOTIQRRLA--KAKRGNIG--  
WKDT--RDVRLSTKHAIFVYVAFKKRALQMEQKNTNQHAATTSTSQSLQSMSTSANQFAVISTNLSEQSTSTKTNRQYRRLEKFEAILAANKAGIDLSDOMGAYAT--  
WKDK--RDVYCLSSLHGSEIDALSNSSGD--AGVKLRLVCDYNTMHGGVDLHDLQVYYS--  
WQDN--KTVRLLSTVHGNDVTSKEIKKR--GGAGGE--GRIVHKQAVVOYKYMGGVDKDLRLAYYS--  
WKDKKA--KKEVILASTSATAEADVTVQRG--KVKPGAIHAYYSMNGCDRADDMIGYGG--  
WKDK--RDVHMCTTVHTAEFIDVPGVVD--KTI--QATQRRCIVAYDKYMGAVDRCDMISYFA--  
WHDT--KRVSALSTIHPSGCQQRQVDR--RSAGG--VRQVTKTAICGYSSMGGVDLLDOL--  
WKDK--RDVHMCTTIHDASFVEVPGVVD--RTS--GDFIQRACILAYDKYMGAVDRCDMITYFA--  
YMDK--KEIHMMLSTIHTIDFVEQCKKK--KSNGN--EIKKKKAVLDYRTMGGVDMADQCLSYYP--  
WKDK--KILTMLSTIHTALVSVESKRS--TIKQKPKVYVDYRSMGGVDKDDCLSYYP--  
FKDKKA--KNVIMYSTDAEVGTAK--VNDVKPSMVDYTRNMNGCDKLDKVTYNC--  
WKDK--KDVSLISTIHTIEMODVTNQR--ETKSRPKCVVDYDKMGGVDKVDHLAAYS--  
WQDT--KQVCVLFNHDHARRQVIRV--AE--NIVQYPKLLSDYQKMKGVDLCDMIGYGM--  
WMDK--KEVFMMLSTIHRNGLVESTKTNF--QS--FEKIMKPKVIDLSLFMGGVDYDMRMSFE--  
WQDKKA--KKECIMYSTKSNRIINVQK--RSYEMKPEMVHDYKMMNGCDRADDMLSYYS--  
YQDS--KTVYLLSTETSNIVTTSNHDF--HT--NETKIRSMVHYVKKMGAYDRNOMVENNK--  
YKEGRR--KRPVRLSTLGRAE--LTVNGPKVYIETYSKMGVDLADOLTSAYV--  
WQDKKA--KRPVAIVSTMAKAENREIKN--VKPAAVDYTKMYGCDLYDKIGYGG--  
WMDQ--REIHFISSYHNTHQTLKRN--KDG--TVDVTPQLCIDYTKYMGCDVNDVYCRLNK--  
WFDK--KQVNLISSTIHTMFERKTYRTK--STAGH--MREVDKPAALIELYSRYMOGVDRDOLLWYNL--  
WMDK--KEVSMMLSTYHRSEMQTVQTHR--KDKKPAALVITYKNMGAVDADOMLVAYF--  
WRDK--RKLTIISTINQSDQEVQRQK--DGT--VKNVTCPMKVKLYSAYMNGVDHADQLRSYTN--  
WRDK--RNLTIISTINQSNQEVMRQK--DGS--VKNVTCPMKVKLYSAYMNGVDHADQLRSYTN--  
WKDK--KCVTLSTNTSGTEITRGG--GG--NFQKVPYSAVNTYKSMGGVDRFDOLSYYP--  
WKDK--KEIIVLSTGGEMEIVKVNRI--GGI--VNEVTCPEIIRNYSNFMGGVDLADONRHYD--  
WLDK--KQISISTNNKNEICEVYRK--AE--KLSVQCPVVFQAYRNMGVDLADRRKYE--  
WFDN--KCIITLGSCHSTOQDTCRW--RKQKK--YISVTRFDIVNOYANMGGVDLMDRMISYR--  
WKDN--KYVTLLVSFAGTHPESVVR--RKMKK--VIEVNCFYIQEYRHMGGVDLLDSHTRK--  
WKDN--KQVLLSTYVGAEPKTICTYE--KLLKA--NQVSWPRVKEYNAHMGIDLMDSFGRYR--  
WFDN--KPIIMASSVHAKIPEDICQ--KKEKR--YVEVKRPSIVRAYNAKMGVDLCDRMISFYR--  
WYDN--KVVNLLSTYVGTETRIKVMWF--SAQKA--RKEIDCQITISTYNOHMGVDLLDSLMGLYR--  
WYDN--RFTVLASFNGVAVDDVRWD--KRSRS--FVMVRFEIVHRYNTSMGGVDKLDLISLYR--  
WFDK--KPIILIASAAHGEIQLDKRW--KRTKS--YIEVERFEIROYYSKMGVDLCDRMISYR--  
WFDN--KCIITLGSCHSTOQDTCRW--RKQKK--YISVTRFDIVNOYANMGGVDLMDRMISYR--  
WCDN--KCVTFLSTFVGGOPELSQLWD--GESR--YKSVTCPLVKYKXHMGGVDLIDSLIGLYR--  
WKDN--RTVTLLSTDMGVEPSSVIRYC--SETKM--KEPVSCPAVKSYSATMGGIDKSDMLVHLYR--  
WFDN--KRVHLISSYAGINPQLARWS--LKDKK--VVMNQPHIVKEYRFMGGVDLHDMVALYR--  
WYDN--KVVSLYSTFVGAEPCQIRF--KKEQT--RKEISCRIISYKXHMGGVDNLDLSLLGLYR--  
WIDT--KSVILASFVGIIEEDEVO--KEKKE--YIKKRFPEVVKRYRKMGGVDLMDLIALYR--  
WNDN--SVVSIANALSVPFLHNVTYS--QKKKK--NISVTPHLVRYVENMGGVDRCDNISLYR--  
WNDN--SVVTIGNHLSHSLGKAKKYS--RKDKK--KVDISQPHLTKRYNEGMGGVDLDRLLGLYK--  
WKDN--NIVTVANMEEKYETS VKWN--RHRR--FDNQVQPKCISRYNEHMGVDLHDLQVRYH--  
WNDN--KCVTMNSNFDSQPLARVKWD--RSQRA--HKYEQPRMVNYSKFMGGVDAHDWLCCKYS--  
WNDH--SVVHILSNVYGVPITSLRW--KSEKR--KIDIMPFLVSMYNTYMGVDLMDNIGNRYR--  
WNDN--SVVTIGNHLSHSLGKAKKYS--RKDKK--KIEICQNLIKKYNEMGGVDLDRLLGLAYR--  
WNDN--SVVSISSCNGLEPMKEVKWS--SANKK--HVLISQFYIINOYKYMGGDRMDNINENR--  
WQDN--ARVTLASTCYGVPPQKVRYS--RVQKR--HVEVDRPHVGYKXEMGGIDRMDNINENR--  
WHDN--GIVTMASSEFGVSPVRAERC--ASQKK--RMKYSMPNVIIHYKNMGVDLMDNIAQYR--  
WNDN--GCMVYASNDNILLQKARWS--STKKA--SVDNPOALIKRYNTHMGVDLDRFMAKYR--  
WNDN--SVVTLISNWLGLALQNVMSYS--AKQKQ--KVAVKQPEVVAAMONMGGVDLDRLLSAYR--  
WYDN--SACSMLSNWDISKPLNNVKWS--RTTKS--KENILQPKLFASYSNEMGGVDNHDCLSLYR--  
WMDN--NVVSMNLNCCGKPLSQVRWS--AAQKK--HIFISQPMVAOYRFMGGIDRMDNIAKLR--  
WNDN--SVVSIANFAGDMLKAVO--KKEKK--FIQVTPNIIISLYONMGGVDRADONVAKYR--  
WRDT--KAFRYASNYHGSDIVKVLK--QRDGS--YKTKSCPAIDDYVNNMGGVDANOLRSYR--  
WRDT--KAFRYASNYHGSDIVKVRK--QRDGS--FSKSCPAIDDYVNNMGGVDANOLRSYR--  
WKDT--KPFRLASFNGSEIVKVRK--QRDGS--FRTKSCPAIADYVNNMGGVDANOLHSYR--  
ERDT--KAFRYASNENGSKYKVRK--QRDGS--FRTKSCPAIGDYVNNMGGVDANOLRSYR--

195  
195  
191  
197  
189  
192  
194  
192  
195  
197  
195  
156  
198  
192  
198  
190  
198  
211  
197  
202  
213  
213  
128  
215  
255  
197  
214  
199  
199  
199  
199  
207  
199  
199  
199  
204  
200  
193  
199  
205  
202  
196  
200  
200  
201  
205  
214  
212  
212  
211  
209  
208  
211  
213  
219  
208  
174  
209  
212  
203  
206  
207  
205  
203  
207  
216  
213  
207  
211  
210  
207  
207  
209  
208  
198



F

F-PiggyBac-2\_Alone  
F-PiggyBac-2\_Hrob  
F-PiggyBac-3\_Aamp  
F-PiggyBac-3\_Csap  
F-PiggyBac-3\_Hrob  
F-PiggyBac-4\_Hrob  
F-PiggyBac-5\_Hrob  
F-PiggyBac-6\_Acal  
F-PiggyBac-6\_Bgla  
Pokey-PiggyBac-1\_Do  
Pokey-PiggyBac-1\_Dp  
Pokey-PiggyBac-2\_Do  
Pokey-PiggyBac-2\_Dp

## Pokey

A

B

C

D

E

F

Pokey

A-PiggyBac-13\_Smed

A-PiggyBac-2\_Smed

A-PiggyBac-3\_Trub

B-PiggyBac-12\_Aaur

B-PiggyBac-12\_Acal

B-PiggyBac-15\_Acal

B-PiggyBac-16\_Acal

B-PiggyBac-17\_Acal

B-PiggyBac-18\_Atri

B-PiggyBac-19\_Atri

B-PiggyBac-2\_Ptup

B-PiggyBac-3\_Smed

B-PiggyBac-4\_Csap

B-PiggyBac-4\_Tbim

B-PiggyBac-5\_Aamp

B-PiggyBac-5\_Lrub

C-PiggyBac-10\_Atri

C-PiggyBac-14\_Atri

C-PiggyBac-16\_Atri

C-PiggyBac-1\_Agra

C-PiggyBac-1\_Airr

C-PiggyBac-1\_Bgla

C-PiggyBac-1\_Lpic

C-PiggyBac-1\_Lvar

C-PiggyBac-1\_Ppaln

C-PiggyBac-20\_Atri

C-PiggyBac-21\_Atri

C-PiggyBac-27\_Acal

C-PiggyBac-2\_Agra

C-PiggyBac-2\_Bgla

C-PiggyBac-2\_Cgig

C-PiggyBac-2\_Lvar

C-PiggyBac-2\_Oedu

C-PiggyBac-3\_Aaur

C-PiggyBac-3\_Atri

C-PiggyBac-4\_Bgla

C-PiggyBac-4\_Lhes

C-PiggyBac-4\_Oedu

C-PiggyBac-4\_Smed

C-PiggyBac-5\_Bgla

C-PiggyBac-6\_Cvir

C-PiggyBac-6\_Mvir

C-PiggyBac-7\_Bgla

C-PiggyBac-8\_Bgla

C-PiggyBac-8\_Lrub

C-PiggyBac-9\_Lrub

D-PiggyBac-1\_Cgig

D-PiggyBac-1\_Oedu

D-PiggyBac-3\_Bgla

D-PiggyBac-4\_Tver

D-PiggyBac-6\_Aaur

E-PiggyBac-11\_Lrub

E-PiggyBac-11\_Smed

E-PiggyBac-12\_Smed

E-PiggyBac-19\_Acal

E-PiggyBac-1\_Acal

E-PiggyBac-1\_Lrub

E-PiggyBac-20\_Acal

E-PiggyBac-26\_Acal

E-PiggyBac-28\_Acal

E-PiggyBac-2\_Ppale

E-PiggyBac-4\_Lrub

E-PiggyBac-7\_Lrub

F-PiggyBac-7\_Tver

F-PiggyBac-10\_Acal

F-PiggyBac-1\_Alon

F-PiggyBac-1\_Tbim

F-PiggyBac-2\_Aamp

F-PiggyBac-2\_Acal

F-PiggyBac-2\_Alon

F-PiggyBac-2\_Hrob

F-PiggyBac-3\_Aamp

F-PiggyBac-3\_Csap

F-PiggyBac-3\_Hrob

F-PiggyBac-4\_Hrob

F-PiggyBac-5\_Hrob

F-PiggyBac-6\_Acal

F-PiggyBac-6\_Bgla

Pokey-PiggyBac-1\_Dobt

Pokey-PiggyBac-1\_Dpuli

Pokey-PiggyBac-2\_Dobt

Pokey-PiggyBac-2\_Dpuli

YVR - KWCQIG - YCN - NNK - TNICNK - KKS LCGKCTRSKIY - TCRNCEQQYVN - N

TNTR - KQCQTG - FCN - KKK - TTMCDK - KRYVCGKISVKKI - ICKRCEE -

- KR - GKCAKI - CCK - DNHA - TVRCVDC - YRY LCGKRKEQW - QCQDC -

KLSY - RRCY - LCREK - DKK - KTTCLK - EKNICREHSVIEA - VCTNCKOSNY - SDCT - P

KRKQ - GRCI - LCDRSK - DKK - RTTCHRC - GSACAYHLVA - LCTGCA -

KRTQ - GRCH - LCREC - DRK - RKFCDK - SRPACFAHSVNNL - LCDCKLI -

KAKR - RRCS - LCGDN - DKA - ARECTL - NRVCGEHSQQQA - VDCSCY -

IAGR - GCCY - YCAKR - KKK - KQLCDG - EKHYCGEHSRVKMSRRCCNCATEND - Q

KANY - KRCA - FCPNK - DRK - RFMCQK - EKSLGVEHOFV - ICNCL -

- RN - ENCD - FPQKK - NKKFLERDAM - YVVR - ENKKVYVVKKM - YAGNIAALFA - ANVSK - M

KETY - KRCA - FCPNK - DRK - RFICOK - EKSLGVEHOFV - ICNCL -

TNIR - RRCY - LCPAK - GRA - KQCCGC - GKNVCEHSQKIV - VCKTCLNK -

- GK - KRCH - ICWKT - ASKC - RTVCTR - HKVVCQQHYRI - YCTDCQYM -

QKKR - KRCA - ICTTSK - DRKA - SCWFSQ - TRVCKEHRHVLL - FGRNV -

GHER - GRRC - ICMEESHG - GFK - RRRG - AMGSSRCEG - GQYVCANHSNK - VCNSTCE -

KKTQ - GRCH - LCREC - DRK - RKFCDK - FRPACFAHSVNNL - LCDCKM -

LRFPA - RQCA - VCCSKRNNEX - KRIRKE - RYFC - DVLGCI - TFCFKLYH - TQKDF -

SNPT - RQCT - LCSRKRDSRX -

REPT - RRCV - VCVASKNNG - KIRKE - RIWCD - EVALCN - ICFCKIYH - TQRNY -

- NS - LVCK - VCSKITSETFKQQYQHT - KQDRKMMYVSR - QIGCEEC - NVBLCLTKD - RNCCKAWH - TKAEYWR -

NHAK - RRCV - VCGFAEAELEFRSA - NPEE - VPKRMRE - CFQCKG - QVALCI - ECFCELFH - TKAEYVLAYKRLKSVL - EBYTLKLHQNCIYS - STVLLLTILLQTVTADNFTTNCYC -

- KK - RQCV - GWECTG - KVLG - ECFCAKYL - RQL -

- KS - RECT - VCSDRKGD - RKR - SFGLRC - GVAVC - ECKNSQHK - K -

- KY - RECT - VCSDRKGD - RKR - SFGLRC - GVAVC - ECKNSQHK - K -

- TQ - SKCA - VCSDRKGD - VHTRRVD - LYAGVC - KVRMC - VCFCHRYH - YMSDYTYDD - QKASSA - RRRKHCSVSS -

- VR - RKCH - IYINISKTE - GREQARKKA - KLITYCDN - DQOMC - RNCFNAKI -

- VR - KRCR - VCAQKNSQT - GNSRDTR - VMRCCK - DVLGV - GECFELWH - TKATI -

- YR - DCN - VCSDRNV - RRVO - TFYCKC - NVPLCKMS - KNCFERYH - TVLNY -

- OD - RRCK - VCSYKO - VKRC - NFICKG - EHPHLH - KHCFEIWH - TKVNF -

SKPL - RTCG - VCSITTKRKTVD - DRKTVR - SYECKVC - DVLGV - DPCFKLYH - TKKDFKQAYNRLQEON - VESSDD -

- GRYY - DCV - VCSKKNNG - RKT - SYECKVC - DVLGV - DPCFKLYH - TKKDFKQAYNRLQEON - VESSDD -

SKPL - RTCG - VCSITTKRKSVD - DRKTVR - SYECKVC - DVLGV - DPCFKLYH - TKKDYKQAIQRYRQON - AESDDSD -

KTLS - RVCI - VCGKKFDNK - RRLRKE - RFECCK - KVALCI - TPCFERYH - TVMDY -

KYST - RRCA - VCSKTNANS - KVRRE - RFECVIC - KPYLEQF - TESNFLRS - NRFQNSL - WRATSYV - LG - LRKIRWDFLRSKRSK -

- RD - RDCV - FCSTSTK - RAR - HFFCSG - EAKPHLH - KGCFSKFFH - EAQ -

SNPT - RQCT - LCSRKRDCRG - KVRKE - RYQCTEC - QVSLCV - VPCFKNYH - TKTNI -

- KN - KVCR - ECLSQSSE - RKG - KFCQOC - NVAHV - LECSSKHJ - MRMMTV -

DNGK - KCCV - VCSRSS - RKR - TIMQLC - DVLGCI - VPCFKDYH - TKVNL -

- ND - RCV - YCKSSQ - RKR - RFCCSC - SQRLGV - KHCFLRYH - EDLAKI -

- LH - RQCI - VCGFAERKMCDAV - RGE - KRRF - HMT - SYCKOC - NVPLCI - TCEEFH - TKQEF - FLAYKRMKSAE - ANCNTTE -

- KE - KDCC - ACSERHGWG - RKR - RTICVIC - GKGLH - KMRONHY - CVSED -

- KE - NRCK - VCSYKK - RAR - HMT - DRPHLH - KDCFKWH - TQVHF -

- GN - NLGV - VCAYKFNKHVKQF - DMDYNSR - VKKIK - KFWKLC - QIYLCIKE - STCWEDWH - TKKEYWR -

KSR - DCE - VCSNRSVK - RHQV - QTMCKC - KLFMCA - VPCFERYH - TLDYKAKCTAEYHA -

KART - RCK - VCSHLG - DG - KIRKE - VFMADC - DVLGV - EPCFERYH - TKYNY -

- KK - RRCK - QCTKSQV - RRE - LSGCQC - DYNLC - NDCFKF - LENFP - Q

- KK - RRCK - QCTKSQV - RRE - LSGCQC - DYNLC - NDCFKF - LDNFP - Q

- NK - RACH - WCMKNKQF - RNRHAE - VYGCNL - QIRLCK - ECFCKF - NSLTL - SH - V

- RK - RNCH - ECKMMNKTR - SNL - IQ - TWMCKT - KLCLC - LKCF - F - KMNNLD -

- RK - RTGV - RCRKLGLKTA - AGRSIE - SWECTG - KICLC - QNCFVDN -

- IK - MRCK - YNC - KGF - RTCKEC - GVLCLNKN - NNCCKNFH - TQ -

- SR - NKCK - FNNC - RKL - SWFKKC - KVS LCDNKN - NCCFALFH - A

- VKNAMRCR - NSGC - SSK - KVKCQC - KVVLCRAE - RNCFEQFH - RD -

- ER - LRCR - LGC - SGO - RVSCCK - NISLCFSKD - KNCFKREH - TE -

- KKEATRCK - RSLC - SSK - HVGCDK - NVHVCVPG - RNCFKMEH - RQ -

- VKN -

- VKSAMRCR - NLAC - KYK - MIRCKT - DMFLCLTIS - RNCFAQFH - KK -

- KR - NRQV - QSLC - TGI - RVSCCK - NVALCCNKK - KNCFYDYH - VSK -

- QR -

- VK - HRCA - MCK - YAK - RVRLIC - NVALCCTKE - KNHFEAYH - KHE -

- KK - TRCR - TAS - Y - TKCP -

- LKNETRCK - YNNC - KFK - NMMLCK - KVHLCLKR - RNCFKAFH - ENK -

- KO - TRCR - HQKC - TTRCKC - NIGLHVK - CFIDYH - KK -

- TO - GRCA - EC - MKN - KCFG - DKRLHON - CFTFYHQI - QANNK -

- RF - QRCR - EC - EKR - TYACEK - KVLHLE - CFKLYH - QV -

- KO - RRCK - GGGC - SSK - RSYCEK - CAVLCI - CFKLYH - TK -

- KO - NRCA - NC - KKN - KKKCAK - NINLES - CFHFFH - KTH -

- TO - GRCA - QC - MSN - RKKLAC - DKRLHVN - CFAIYHKI - ITTNN -

- GR - KRCK - LC - HKV - SKKCLK - DVALHLE - CFEHFF - RK -

- SS - SRPHGGPTTEG - TAKV - GCKVC - AVFLGVN - CFAFEH - GVAQ -

- SR - RRCK - QC - KSN - VOMSKY -

- KO - SRC -

- TO - RCS - LC - QKN - RKWCEIC - GKRLHEK - CFKFFH - NL -

- KO - LKCT - FC - HMKA - RWMCKK - GKTLCIE - KCFEKYH - LASA -

- GO - KRCA - AC - KKV - QRKCTK - NVPLHVN - CFERFH - TK -

- TT - RRCA - LC - KKT - NCKSGV - NVGLHPK - CFRLFH - GHTM -

- AR - GRCE - WQATRK - NKL - ESR - FSKCK - NVFLCLGKK - RNCFVEFH - DNNYTSSEAH - LDEVEAVYSASEES - GQASDHE - TNKECSSSSADSDELE - NSNRRE - YMIDD - YDDFQ - Q

- AR - GRCE - WQATRK - NKL - ESR - FSKCK - NVFLCLGKK - RNCFVEFH - DNNYTSSEAH - LDEVEAVYSASEES - GQASDHE - TNKECSSSSADSDELE - NSNRRE - YMIDD - YDDFQ - Q

RNCFLEFH - DDRILD - TKAA - ETVLAVD - EEEI - IAVQTVETDHL - GIFYSS - SSS - SSS
